# Supplementary material
Source: PubMed Central journal article supplement (PMC5134010)
Supplement: rsif20160535supp1.pdf [file rsif20160535supp1.pdf]

Supplemental online material

Table 1. Data used for analysis. Phyl. – phylogenetic assignment (1 – Basal land plants, 2 – Zosterophyll and Lycophyte, 3 – Ferns and Horsetails, 4 – Lignophytes (non-angiosperms), 5 – Angiosperms. Where pore radius was not measured directly, it was estimated following Franks, P.J., Beerling, D.J. (cit. 3) where it was assumed to be 1/6 of stomatal apparatus length.

| Species                               | Age, Myr | Phyl. | Pore radius [m] | Pore area [m <sup>2</sup> ] | Pore density | Source |
|---------------------------------------|----------|-------|-----------------|-----------------------------|--------------|--------|
| <i>Aglaophyton major</i>              | 395      | 1     | 1.75E-05        | 9.61625E-10                 | 4.30E+06     | 3      |
| <i>Sawdonia ornata</i>                | 395      | 2     | 6.40E-06        | 1.28742E-10                 | 4.30E+06     | 3      |
| <i>Horneophyton lignieri</i>          | 395      | 1     | 5.50E-06        | 9.4985E-11                  | 3.00E+06     | 3      |
| <i>Aglayophyton major</i>             | 395      | 1     | 1.50E-05        | 7.065E-10                   | 1.00E+06     | 3      |
| <i>Rhynia gwynne-vaughanii</i>        | 395      | 1     | 1.73E-05        | 9.42557E-10                 | 1.80E+06     | 3      |
| <i>Nothia aphylla</i>                 | 395      | 1     | 1.50E-05        | 7.065E-10                   | 5.50E+06     | 3      |
| <i>Asteroxylon mackiei</i>            | 395      | 2     | 1.10E-05        | 3.7994E-10                  | 2.10E+07     | 3      |
| <i>Drepanophycus spinaeformis</i>     | 395      | 2     | 0.80E-05        | 2.0096E-10                  | 1.66E+07     | 3      |
| <i>Sporathylacium salopense</i>       | 395      | 1     | 0.50E-05        | 7.85E-11                    | 4.20E+07     | 3      |
| <i>Sporoginites exuberans</i>         | 395      | 1     | 9.35E-06        | 2.7445E-10                  | 1.10E+07     | 3      |
| <i>Hsua robusta</i>                   | 395      | 1     | 1.50E-05        | 7.065E-10                   | 5.00E+06     | 3      |
| <i>Baragwanathia abilitiensis</i>     | 390      | 2     | 0.33E-05        | 3.41946E-11                 | 2.80E+07     | 5      |
| <i>Drepanophycus spinaeformis</i>     | 390      | 2     | 0.80E-05        | 2.0096E-10                  | 1.30E+07     | 3      |
| <i>Archaeopteris macilenta</i>        | 385      | 4     | 0.75E-05        | 1.76625E-10                 | 3.20E+07     | 3      |
| <i>Archaeopteris macilenta</i>        | 385      | 4     | 0.75E-05        | 1.76625E-10                 | 3.70E+07     | 3      |
| <i>Swillingtonia denticulata</i>      | 310      | 4     | 0.60E-05        | 1.1304E-10                  | 1.33E+08     | 3      |
| <i>Blanziopteris praedentata</i>      | 305      | 4     | 0.75E-05        | 1.76625E-10                 | 3.10E+08     | 3      |
| <i>Reticulopteris germarii</i>        | 305      | 4     | 3.25E-06        | 3.32667E-11                 | 3.00E+08     | 3      |
| <i>Neuropteris obliqua</i>            | 305      | 4     | 3.25E-06        | 3.32667E-11                 | 1.13E+08     | 3      |
| <i>Laveineopteris loshii</i>          | 305      | 4     | 0.75E-05        | 1.76625E-10                 | 3.25E+08     | 3      |
| <i>Neuraethopteris schlehanii</i>     | 305      | 4     | 3.56E-06        | 3.992E-11                   | 3.00E+08     | 3      |
| <i>Neuropteris loshii</i>             | 305      | 4     | 2.69E-06        | 2.28431E-11                 | 2.00E+08     | 3      |
| <i>Neuropteris tenuifolia</i>         | 305      | 4     | 2.69E-06        | 2.28431E-11                 | 3.00E+08     | 3      |
| <i>Neuropteris rarinervi</i>          | 305      | 4     | 3.25E-06        | 3.32667E-11                 | 1.40E+08     | 3      |
| <i>Neuropteris ovata var. simonii</i> | 305      | 4     | 3.25E-06        | 3.32667E-11                 | 9.00E+07     | 3      |
| <i>Neuropteris ovata var. sarana</i>  | 305      | 4     | 3.56E-06        | 3.992E-11                   | 2.80E+07     | 3      |
| <i>Neuropteris aconiensis</i>         | 305      | 4     | 2.06E-06        | 1.33067E-11                 | 5.00E+07     | 3      |
| <i>Neuropteris flexuosa</i>           | 305      | 4     | 2.97E-06        | 2.77223E-11                 | 1.20E+08     | 3      |
| <i>Neuropteris scheuchzeri</i>        | 305      | 4     | 2.66E-06        | 2.21778E-11                 | 9.00E+07     | 3      |
| <i>Neuropteris macrophylla</i>        | 305      | 4     | 2.66E-06        | 2.21778E-11                 | 6.50E+07     | 3      |
| <i>Neuropteris britannica</i>         | 305      | 4     | 2.70E-06        | 2.28431E-11                 | 1.30E+08     | 3      |
| <i>Neuropteris subariculata</i>       | 305      | 4     | 3.24E-06        | 3.2934E-11                  | 9.10E+07     | 3      |
| <i>Neuropteris sp. 1</i>              | 305      | 4     | 3.78E-06        | 4.47992E-11                 | 1.80E+08     | 3      |
| <i>Neuropteris sp. 2</i>              | 305      | 4     | 2.70E-06        | 2.28431E-11                 | 1.80E+08     | 3      |

|                                       |     |   |          |             |          |   |
|---------------------------------------|-----|---|----------|-------------|----------|---|
| <i>Alethopteris sullivanti</i>        | 305 | 4 | 4.98E-06 | 7.78441E-11 | 4.72E+08 | 3 |
| <i>Alethopteris lesquereuxi</i>       | 305 | 4 | 4.66E-06 | 6.83076E-11 | 2.50E+08 | 3 |
| <i>Lepidodendron obovatum</i>         | 305 | 2 | 7.46E-06 | 1.7465E-10  | 2.00E+08 | 3 |
| <i>Lepidodendron dichotomum</i>       | 305 | 2 | 5.94E-06 | 1.10889E-10 | 4.50E+08 | 3 |
| <i>Lepidodendron loricatum</i>        | 305 | 2 | 6.30E-06 | 1.2475E-10  | 2.00E+08 | 3 |
| <i>Senftenbergia plumosa</i>          | 305 | 3 | 2.66E-06 | 2.21778E-11 | 2.00E+08 | 3 |
| <i>Laveinopteris tenuifolia</i>       | 305 | 4 | 3.99E-06 | 4.99001E-11 | 3.70E+08 | 3 |
| <i>Cordaites principalis morph. 1</i> | 305 | 4 | 1.92E-06 | 1.15325E-11 | 5.60E+08 | 3 |
| <i>Cordaites principalis morph. 2</i> | 305 | 4 | 4.24E-06 | 5.65534E-11 | 1.04E+08 | 3 |
| <i>Cordaites principalis morph. 3</i> | 305 | 4 | 2.76E-06 | 2.3952E-11  | 1.50E+08 | 3 |
| <i>Cordaites principalis morph. 4</i> | 305 | 4 | 4.37E-06 | 5.98801E-11 | 2.04E+08 | 3 |
| <i>Neopteris ovata</i>                | 305 | 4 | 2.30E-06 | 1.66334E-11 | 3.43E+08 | 3 |
| <i>Lescuropteris genuina</i>          | 305 | 4 | 3.76E-06 | 4.43556E-11 | 9.10E+07 | 3 |
| <i>Schopfiastrum decussatum</i>       | 305 | 4 | 3.87E-06 | 4.71278E-11 | 2.80E+07 | 3 |
| <i>Karinopteris spp.</i>              | 300 | 4 | 5.11E-06 | 8.21525E-11 | 3.80E+07 | 5 |
| <i>Lebachia frondosa</i>              | 288 | 4 | 2.64E-06 | 2.18845E-11 | 3.09E+08 | 5 |
| <i>Sphenophyllum apiciserratum</i>    | 270 | 3 | 5.64E-06 | 9.98001E-11 | 3.80E+07 | 3 |
| <i>Sphenophyllum kaboense</i>         | 270 | 3 | 5.45E-06 | 9.31468E-11 | 3.40E+07 | 3 |
| <i>Gigantonoclea guizhouensis</i>     | 270 | 4 | 9.45E-06 | 2.80549E-10 | 7.00E+07 | 3 |
| <i>Gigantonoclea pubescens</i>        | 260 | 4 | 3.99E-06 | 4.99001E-11 | 1.84E+08 | 3 |
| <i>"Callipteris" changii</i>          | 250 | 4 | 2.48E-06 | 1.92345E-11 | 3.84E+08 | 5 |
| <i>Gigantonoclea guizhouensis</i>     | 220 | 4 | 2.48E-06 | 1.92345E-11 | 7.00E+07 | 5 |
| <i>Williamsonia nizhonia</i>          | 220 | 4 | 2.97E-06 | 2.76976E-11 | 1.50E+07 | 5 |
| <i>Glossophyllum florinii</i>         | 200 | 4 | 1.05E-05 | 3.45974E-10 | 4.80E+07 | 3 |
| <i>Pagiophyllum papillatus</i>        | 200 | 4 | 1.26E-05 | 5.00109E-10 | 1.11E+08 | 3 |
| <i>Brachyphyllum comancheanum</i>     | 200 | 4 | 5.64E-06 | 9.98001E-11 | 6.30E+07 | 3 |
| <i>Eoginkgoites davidsonii</i>        | 200 | 4 | 5.64E-06 | 9.98001E-11 | 3.00E+07 | 3 |
| <i>Aricycas paulae</i>                | 200 | 4 | 1.13E-05 | 3.992E-10   | 6.00E+07 | 3 |
| <i>Cladophlebis yazzia</i>            | 200 | 3 | 6.77E-06 | 1.43712E-10 | 2.00E+07 | 3 |
| <i>Nilsonia sturii</i>                | 200 | 4 | 5.12E-06 | 8.21687E-11 | 1.00E+08 | 3 |
| <i>Nilsonia lunzensis</i>             | 200 | 4 | 7.37E-06 | 1.70769E-10 | 4.20E+07 | 3 |
| <i>Nilsonia neuberi</i>               | 200 | 4 | 5.78E-06 | 1.0479E-10  | 1.17E+08 | 3 |
| <i>Sphenobaiera huangii</i>           | 190 | 4 | 6.55E-06 | 1.34841E-10 | 4.80E+07 | 3 |
| <i>Czekanowskia microphylla</i>       | 175 | 4 | 8.58E-06 | 2.31155E-10 | 5.00E+07 | 5 |
| <i>Brachyphyllum negevensis</i>       | 170 | 4 | 2.28E-06 | 1.628E-11   | 4.00E+07 | 5 |
| <i>Brachyphyllum pulher</i>           | 170 | 4 | 4.95E-06 | 7.69379E-11 | 5.00E+07 | 5 |
| <i>Pagiophyllum peregrinum</i>        | 168 | 4 | 3.88E-06 | 4.72099E-11 | 1.09E+08 | 5 |
| <i>Czekanowskia turneri</i>           | 150 | 4 | 1.11E-05 | 3.88112E-10 | 2.40E+07 | 3 |
| <i>Czekanowskia nipponica</i>         | 150 | 4 | 9.10E-06 | 3.88112E-10 | 3.20E+07 | 5 |
| <i>Otozamites ornatus</i>             | 140 | 4 | 9.68E-06 | 2.94078E-10 | 6.90E+07 | 3 |
| <i>Pseudofrenelopsis dalatzensis</i>  | 140 | 4 | 1.59E-05 | 7.90084E-10 | 7.20E+07 | 3 |

|                                       |     |   |           |             |          |   |
|---------------------------------------|-----|---|-----------|-------------|----------|---|
| <i>Pseudofrenelopsis heishanensis</i> | 140 | 4 | 1.88E-05  | 1.10889E-09 | 6.10E+07 | 3 |
| <i>Pseudofrenelopsis papillosa</i>    | 140 | 4 | 1.43E-05  | 6.46372E-10 | 5.50E+07 | 3 |
| <i>Pseudoctenus ornata</i>            | 140 | 4 | 1.88E-05  | 1.10889E-09 | 1.40E+07 | 3 |
| <i>Sagenopteris inequilateralis</i>   | 140 | 4 | 6.62E-06  | 1.37724E-10 | 4.00E+07 | 3 |
| <i>Frenoelopsis varians</i>           | 140 | 4 | 6.30E-06  | 1.24627E-10 | 3.10E+07 | 5 |
| <i>Glenrosa lexensis</i>              | 130 | 4 | 1.19E-05  | 4.44655E-10 | 4.80E+07 | 5 |
| <i>Glenrosa pagiophylloides</i>       | 130 | 4 | 4.90 E-06 | 7.53914E-11 | 2.80E+07 | 5 |
| <i>Araucaria grandifolia</i>          | 105 | 4 | 7.04E-06  | 1.55688E-10 | 4.00E+07 | 3 |
| <i>Araucaria seorsum</i>              | 105 | 4 | 1.29E-05  | 5.21178E-10 | 2.80E+07 | 3 |
| <i>Araucaria lanceolatus</i>          | 105 | 4 | 1.16E-05  | 4.21378E-10 | 3.20E+07 | 3 |
| <i>Araucaria acutifoliatius</i>       | 105 | 4 | 1.09E-05  | 3.71478E-10 | 4.20E+07 | 3 |
| <i>Araucaria falcatus</i>             | 105 | 4 | 7.70E-06  | 1.86294E-10 | 6.70E+07 | 3 |
| <i>Araucaria carinatus</i>            | 105 | 4 | 1.24E-05  | 4.85139E-10 | 1.10E+08 | 3 |
| <i>Pseudofrenelopsis nathorstiana</i> | 100 | 4 | 1.26E-05  | 5.01773E-10 | 1.15E+08 | 3 |
| <i>Pseudofrenelopsis parceramosa</i>  | 100 | 4 | 1.50E-05  | 7.0969E-10  | 4.20E+07 | 3 |
| <i>Watsoniocladius virginianensis</i> | 100 | 4 | 1.35E-05  | 5.76623E-10 | 4.60E+07 | 3 |
| <i>Frenelopsis hogeneggeri</i>        | 95  | 4 | 1.31E-05  | 5.43356E-10 | 1.00E+08 | 3 |
| <i>Frenelopsis kanevianensis</i>      | 95  | 4 | 9.40E-06  | 2.77223E-10 | 3.00E+07 | 3 |
| <i>Frenelopsis veneta</i>             | 95  | 4 | 1.69E-05  | 8.98201E-10 | 9.00E+07 | 3 |
| <i>Brachyphyllum patens</i>           | 95  | 4 | 1.78E-05  | 9.98001E-10 | 5.70E+07 | 3 |
| <i>Pandanites trinervis</i>           | 80  | 5 | 2.97E-06  | 2.77223E-11 | 1.44E+08 | 3 |
| <i>Decussocarpus brownei</i>          | 50  | 4 | 4.44E-06  | 6.18761E-11 | 1.16E+08 | 3 |
| <i>Falcatifolium australis</i>        | 50  | 4 | 6.18E-06  | 1.1976E-10  | 1.58E+08 | 3 |
| <i>Dacrycarpus eocinica</i>           | 50  | 4 | 5.86E-06  | 1.07784E-10 | 2.52E+08 | 3 |
| <i>Prumnopitys tasmanica</i>          | 50  | 4 | 6.25E-06  | 1.22754E-10 | 1.78E+08 | 3 |
| <i>Prumnopitys lanceolata</i>         | 50  | 4 | 4.59E-06  | 6.63116E-11 | 2.00E+08 | 3 |
| <i>Cinnamomum wonnacotti</i>          | 50  | 5 | 3.85 E-06 | 4.65427E-11 | 3.21E+08 | 5 |
| <i>Lusaticutis legulata</i>           | 50  | 5 | 1.94E-06  | 1.18482E-11 | 4.87E+08 | 5 |
| <i>Claibonicutis undulata</i>         | 50  | 5 | 1.87E-06  | 1.10096E-11 | 3.75E+08 | 5 |
| <i>Piliparicutis obtusifolia</i>      | 50  | 5 | 1.94E-06  | 1.18482E-11 | 2.98E+08 | 5 |
| <i>Piliparicutis claibornensis</i>    | 50  | 5 | 2.90 E-06 | 2.64985E-11 | 2.65E+08 | 5 |
| <i>Discrepoparicutis elongata</i>     | 50  | 5 | 2.41 E-06 | 1.83132E-11 | 2.47E+08 | 5 |
| <i>Saxonicutis aligerata</i>          | 50  | 5 | 2.91 E-06 | 2.64985E-11 | 2.64E+08 | 5 |
| <i>Saxonicutis eacenia</i>            | 50  | 5 | 1.94E-06  | 1.18482E-11 | 2.81E+08 | 5 |
| <i>Ocotea obtusifolia</i>             | 45  | 5 | 4.66E-06  | 6.83076E-11 | 3.64E+08 | 3 |
| <i>Knightia excelsa</i>               | 45  | 5 | 4.66E-06  | 6.83076E-11 | 5.96E+08 | 3 |
| <i>Sequoia chinensis</i>              | 45  | 4 | 1.17E-05  | 4.31136E-10 | 6.00E+07 | 3 |
| <i>Sequoia sempervirens</i>           | 15  | 4 | 1.06E-05  | 3.50631E-10 | 8.50E+07 | 3 |
| <i>Abies normanniana</i>              | 0   | 4 | 6.96E-06  | 1.5214E-10  | 1.10E+08 | 3 |
| <i>Cedrus deodara</i>                 | 0   | 4 | 6.45E-06  | 1.30627E-10 | 8.50E+07 | 3 |
| <i>Pinus sylvestris</i>               | 0   | 4 | 5.26E-06  | 8.6937E-11  | 1.20E+08 | 3 |

|                                     |   |   |             |             |          |   |
|-------------------------------------|---|---|-------------|-------------|----------|---|
| <i>Picea pungens</i>                | 0 | 4 | 8.82E-06    | 2.4451E-10  | 3.90E+07 | 3 |
| <i>Larix decidua</i>                | 0 | 4 | 6.21E-06    | 1.21091E-10 | 1.60E+07 | 3 |
| <i>Araucaria arucana</i>            | 0 | 4 | 5.25 E-06   | 8.65463E-11 | 6.50E+07 | 1 |
| <i>Nothofagus cunninghamii</i>      | 0 | 5 | 3.06E-06    | 2.94498E-11 | 5.00E+08 | 1 |
| <i>Metasequoia glyptostroboides</i> | 0 | 4 | 5.95 E-06   | 1.11164E-10 | 1.60E+08 | 1 |
| <i>Taxodium distichum</i>           | 0 | 4 | 4.72 E-06   | 7.01025E-11 | 1.55E+08 | 1 |
| <i>Sequoia sempervirens</i>         | 0 | 4 | 7.18 E-06   | 1.61649E-10 | 8.50E+07 | 1 |
| <i>Lygodium circinatum</i>          | 0 | 3 | 1.30E-05    | 5.35783E-10 | 7.96E+07 | L |
| <i>Nephrolepis exaltata</i>         | 0 | 3 | 1.52E-05    | 7.26316E-10 | 3.88E+07 | L |
| <i>Adiantum raddianum</i>           | 0 | 3 | 1.24E-05    | 4.87449E-10 | 6.94E+07 | L |
| <i>Stenochlana tenuifolia</i>       | 0 | 3 | 1.32E-05    | 5.50576E-10 | 1.20E+08 | L |
| <i>Pyrrosia lingua</i>              | 0 | 3 | 1.65E-05    | 8.57478E-10 | 6.94E+07 | L |
| <i>Davallia fejeensis</i>           | 0 | 3 | 1.77 E-05   | 9.86066E-10 | 4.49E+07 | L |
| <i>Campyloneurum phyllitidis</i>    | 0 | 3 | 1.84E-05    | 1.06411E-09 | 3.47E+07 | L |
| <i>Marsilea sp</i>                  | 0 | 3 | 9.80E-06    | 3.01584E-10 | 1.73E+08 | L |
| <i>Psilotum nudum</i>               | 0 | 3 | 2.56E-05    | 2.05364E-09 | 4.90E+07 | L |
| <i>Osmunda regalis</i>              | 0 | 3 | 8.67E-06    | 2.35972E-10 | 6.70E+07 | 3 |
| <i>Phyllitis scolopendrium</i>      | 0 | 3 | 1.07E-05    | 3.58615E-10 | 5.90E+07 | 3 |
| <i>Pteridium aquilinum</i>          | 0 | 3 | 6.74E-06    | 1.42825E-10 | 8.50E+07 | 3 |
| <i>Gnetum gnemon</i>                | 0 | 4 | 5.40E-06    | 9.16483E-11 | 2.37E+08 | L |
| <i>Zamia floridiana</i>             | 0 | 4 | 4.17E-06    | 5.45139E-11 | 6.53E+07 | L |
| <i>Cycas revoluta</i>               | 0 | 4 | 8.33E-06    | 2.18103E-10 | 6.94E+07 | L |
| <i>Ginkgo biloba</i>                | 0 | 4 | 8.26E-06    | 2.14171E-10 | 8.16E+07 | L |
| <i>Larix x eurolepis</i>            | 0 | 4 | 8.48E-06    | 2.25955E-10 | 9.93E+07 | L |
| <i>Pinus Strobus</i>                | 0 | 4 | 9.79E-06    | 3.01082E-10 | 8.34E+07 | L |
| <i>Metasequoia glyptostroboides</i> | 0 | 4 | 7.72E-06    | 1.8722E-10  | 5.10E+07 | L |
| <i>Taxus baccata</i>                | 0 | 4 | 8.52E-06    | 2.28121E-10 | 3.06E+08 | L |
| <i>Thuja occidentalis</i>           | 0 | 4 | 5.98E-06    | 1.12501E-10 | 3.52E+08 | L |
| <i>Angiopteris evecta</i>           | 0 | 3 | 1.02E-05    | 3.24554E-10 | 7.60E+07 | 8 |
| <i>Botrychium virginianum</i>       | 0 | 3 | 1.08E-05    | 3.68514E-10 | 4.80E+07 | 8 |
| <i>Helminthostachys xeylanica</i>   | 0 | 3 | 8.33E-06    | 2.18056E-10 | 5.00E+07 | 8 |
| <i>Ophioglossum fibrosum</i>        | 0 | 3 | 1.05 E-05   | 3.46185E-10 | 4.70E+07 | 8 |
| <i>Ophioglossum gramineum</i>       | 0 | 3 | 1.03333E-05 | 3.35282E-10 | 6.00E+07 | 8 |
| <i>Ophioglossum nudicaule</i>       | 0 | 3 | 1.56667E-05 | 7.70696E-10 | 4.50E+07 | 8 |
| <i>Ophioglossum reticulatum</i>     | 0 | 3 | 1.46667E-05 | 6.75449E-10 | 2.20E+07 | 8 |
| <i>Cycas revoluta</i>               | 0 | 4 | 0.0000152   | 7.25466E-10 | 5.20E+07 | 7 |
| <i>Dioon merolae</i>                | 0 | 4 | 0.0000082   | 2.11134E-10 | 6.40E+07 | 7 |
| <i>Lepidozamia hopei</i>            | 0 | 4 | 0.0000205   | 1.31959E-09 | 3.10E+07 | 7 |
| <i>Lepidozamia peroffskyana</i>     | 0 | 4 | 0.000014    | 6.1544E-10  | 3.40E+07 | 7 |
| <i>Macrozamia miquelii</i>          | 0 | 4 | 0.000014    | 6.1544E-10  | 6.30E+07 | 7 |
| <i>Zamia integrifolia</i>           | 0 | 4 | 0.000011    | 3.7994E-10  | 7.30E+07 | 7 |

|                                   |   |   |             |             |          |    |
|-----------------------------------|---|---|-------------|-------------|----------|----|
| <i>Dioon edule</i>                | 0 | 4 | 1.19536E-05 | 4.49E-10    | 2.21E+08 | 6  |
| <i>Dioon purpusii</i>             | 0 | 4 | 8.76385E-06 | 2.41E-10    | 1.24E+08 | 6  |
| <i>Dioon angustifolium</i>        | 0 | 4 | 9.19466E-06 | 2.65E-10    | 2.19E+08 | 6  |
| <i>Dioon holmgrenii</i>           | 0 | 4 | 1.15914E-05 | 4.22E-10    | 1.09E+08 | 6  |
| <i>Dioon califanoi</i>            | 0 | 4 | 1.29768E-05 | 5.29E-10    | 1.10E+08 | 6  |
| <i>Dioon tomasellii</i>           | 0 | 4 | 1.13826E-05 | 4.07E-10    | 1.85E+08 | 6  |
| <i>Dioon rzedowskii</i>           | 0 | 4 | 7.18211E-06 | 1.62E-10    | 1.34E+08 | 6  |
| <i>Selaginella emmeliana</i>      | 0 | 2 | 2.55833E-05 | 2.05515E-09 | 8.75E+06 | 9  |
| <i>Selaginella ludoviciana</i>    | 0 | 2 | 0.000012    | 4.5216E-10  | 7.86E+07 | 10 |
| <i>Selaginella apoda</i>          | 0 | 2 | 0.0000085   | 2.26865E-10 | 8.49E+07 | 10 |
| <i>Lycopodium japonicum</i>       | 0 | 2 | 0.0000095   | 2.83385E-10 | 8.89E+07 | 11 |
| <i>Psilotum nodum</i>             | 0 | 3 | 1.74989E-05 | 9.61506E-10 | 2.21E+07 | 12 |
| <i>Tmesipteris tannensis</i>      | 0 | 3 | 1.64591E-05 | 8.5063E-10  | 2.21E+07 | 12 |
| <i>Lycopodium setaceum</i>        | 0 | 2 | 1.16793E-05 | 4.28311E-10 | 2.95E+07 | 12 |
| <i>Phylloglossum drummondii</i>   | 0 | 2 | 1.66818E-05 | 8.7381E-10  | 2.21E+07 | 12 |
| <i>Selaginella chrysochaetos</i>  | 0 | 2 | 4.59675E-06 | 6.63485E-11 | 1.84E+08 | 12 |
| <i>Isoetes coromandelina</i>      | 0 | 2 | 8.60733E-06 | 2.32631E-10 | 5.16E+07 | 12 |
| <i>Angiopteris evecta</i>         | 0 | 3 | 8.2155E-06  | 2.11933E-10 | 1.11E+08 | 12 |
| <i>Marattia attenuata</i>         | 0 | 3 | 1.58278E-05 | 7.86625E-10 | 2.21E+07 | 12 |
| <i>Danea elliptica</i>            | 0 | 3 | 0.00001061  | 3.53476E-10 | 6.64E+07 | 12 |
| <i>Equisetum arvense</i>          | 0 | 3 | 1.02987E-05 | 3.33036E-10 | 5.90E+07 | 12 |
| <i>Equisetum ramosissimum</i>     | 0 | 3 | 0.000017415 | 9.52306E-10 | 4.43E+07 | 12 |
| <i>Botrychium lanuginosum</i>     | 0 | 3 | 0.000014031 | 6.18169E-10 | 3.69E+07 | 12 |
| <i>Helminthostachys zeylonica</i> | 0 | 3 | 0.000010406 | 3.40014E-10 | 4.43E+07 | 12 |
| <i>Ophioglossum petiolatum</i>    | 0 | 3 | 0.000014243 | 6.3699E-10  | 2.95E+07 | 12 |
| <i>Osmunda lancea</i>             | 0 | 3 | 1.10842E-05 | 3.85776E-10 | 5.90E+07 | 12 |
| <i>Schizaea digitata</i>          | 0 | 3 | 1.14739E-05 | 4.13383E-10 | 2.95E+07 | 12 |
| <i>Lygodium circinatum</i>        | 0 | 3 | 8.59533E-06 | 2.31982E-10 | 6.64E+07 | 12 |
| <i>Antrophyum coriaceum</i>       | 0 | 3 | 2.20654E-05 | 1.52881E-09 | 1.48E+07 | 12 |
| <i>Pyrrosia hastata</i>           | 0 | 3 | 5.9975E-06  | 1.12946E-10 | 8.12E+07 | 12 |
| <i>Azolla pinnata</i>             | 0 | 3 | 2.23383E-05 | 1.56686E-09 | 2.21E+07 | 12 |
| <i>Camptosorus sibiricus</i>      | 0 | 3 | 9.49992E-06 | 2.8338E-10  | 3.69E+07 | 12 |
| <i>Drymoglossum heterophyllum</i> | 0 | 3 | 1.11298E-05 | 3.88962E-10 | 1.48E+07 | 12 |
| <i>Cheiropleuria bicuspis</i>     | 0 | 3 | 1.15082E-05 | 4.15855E-10 | 1.48E+07 | 12 |
| <i>Dipteris wallichii</i>         | 0 | 3 | 6.52225E-06 | 1.33575E-10 | 1.03E+08 | 12 |
| <i>Huperzia suberecta</i>         | 0 | 2 | 9.3845E-06  | 2.76536E-10 | 1.19E+07 | 13 |
| <i>Huperzia selago</i>            | 0 | 2 | 9.84775E-06 | 3.04511E-10 | 2.74E+07 | 13 |
| <i>Amborella trichopoda</i>       | 0 | 5 | 5.03517E-06 | 7.96081E-11 | 2.09E+08 | 14 |
| <i>Nuphar luteum</i>              | 0 | 5 | 0.000004245 | 5.65829E-11 | 2.48E+07 | 14 |
| <i>Nuphar intermedia</i>          | 0 | 5 | 4.12833E-06 | 5.35154E-11 | 2.71E+08 | 14 |
| <i>Nymphaea ampla</i>             | 0 | 5 | 3.25167E-06 | 3.32003E-11 | 6.62E+08 | 14 |

|                                  |   |   |             |             |          |    |
|----------------------------------|---|---|-------------|-------------|----------|----|
| <i>Nymphaea mexicana</i>         | 0 | 5 | 0.00000379  | 4.51033E-11 | 5.89E+08 | 14 |
| <i>Nymphaea nuchali</i>          | 0 | 5 | 0.00000265  | 2.20507E-11 | 5.38E+08 | 14 |
| <i>Nymphaea coerulea</i>         | 0 | 5 | 0.000004935 | 7.64723E-11 | 2.44E+08 | 14 |
| <i>Brasenia schreberi</i>        | 0 | 5 | 0.00000372  | 4.34526E-11 | 2.90E+08 | 14 |
| <i>Euryale ferox</i>             | 0 | 5 | 2.51667E-06 | 1.98875E-11 | 1.67E+09 | 14 |
| <i>Victoria cruziana</i>         | 0 | 5 | 3.47667E-06 | 3.79538E-11 | 4.99E+08 | 14 |
| <i>Astrobaileya scandens</i>     | 0 | 5 | 0.00000684  | 1.46907E-10 | 1.74E+08 | 14 |
| <i>Trimenia papuana</i>          | 0 | 5 | 0.00000663  | 1.38025E-10 | 1.56E+08 | 14 |
| <i>Trimenia weinmanniaefolia</i> | 0 | 5 | 0.000006695 | 1.40744E-10 | 2.08E+08 | 14 |
| <i>Schisandra chinensis</i>      | 0 | 5 | 0.00000954  | 2.85776E-10 | 5.01E+07 | 14 |
| <i>Schisandra grandiflora</i>    | 0 | 5 | 9.26667E-06 | 2.69635E-10 | 7.41E+07 | 14 |
| <i>Schisandra incarnata</i>      | 0 | 5 | 1.07767E-05 | 3.64669E-10 | 3.11E+07 | 14 |
| <i>Schisandra glabra</i>         | 0 | 5 | 9.21917E-06 | 2.66878E-10 | 6.13E+07 | 14 |
| <i>Schisandra arisanensis</i>    | 0 | 5 | 9.82333E-06 | 3.03003E-10 | 7.09E+07 | 14 |
| <i>Schisandra rubriflora</i>     | 0 | 5 | 0.00000757  | 1.79937E-10 | 1.03E+08 | 14 |
| <i>Schisandra henryi</i>         | 0 | 5 | 0.000010485 | 3.45197E-10 | 3.98E+07 | 14 |
| <i>Kadsura coccinea</i>          | 0 | 5 | 0.000009865 | 3.05579E-10 | 6.97E+07 | 14 |
| <i>Kadsura japonica</i>          | 0 | 5 | 1.01767E-05 | 3.25193E-10 | 6.46E+07 | 14 |
| <i>Kadsura scandens</i>          | 0 | 5 | 0.00000884  | 2.45377E-10 | 7.57E+07 | 14 |
| <i>Kadsura longipedunculata</i>  | 0 | 5 | 8.94333E-06 | 2.51147E-10 | 7.11E+07 | 14 |
| <i>Kadsura longipedunculata</i>  | 0 | 5 | 7.87333E-06 | 1.94647E-10 | 6.79E+07 | 14 |
| <i>Illicium dunnianum</i>        | 0 | 5 | 0.00001082  | 3.67607E-10 | 6.22E+07 | 14 |
| <i>Illicium leiophyllum</i>      | 0 | 5 | 8.78833E-06 | 2.42517E-10 | 5.23E+07 | 14 |
| <i>Illicium parviflorum</i>      | 0 | 5 | 9.00167E-06 | 2.54434E-10 | 5.51E+07 | 14 |
| <i>Illicium verum</i>            | 0 | 5 | 8.47833E-06 | 2.2571E-10  | 7.32E+07 | 14 |
| <i>Illicium angustisepalum</i>   | 0 | 5 | 6.21333E-06 | 1.21221E-10 | 1.80E+08 | 14 |
| <i>Illicium simonsii</i>         | 0 | 5 | 6.61667E-06 | 1.3747E-10  | 8.92E+07 | 14 |
| <i>Illicium floridanum</i>       | 0 | 5 | 9.55667E-06 | 2.86776E-10 | 4.69E+07 | 14 |
| <i>Hedyosmum bonplandianum</i>   | 0 | 5 | 7.95167E-06 | 1.98539E-10 | 6.74E+07 | 14 |
| <i>Hedyosmum mexicanum</i>       | 0 | 5 | 8.02833E-06 | 2.02386E-10 | 1.09E+08 | 14 |
| <i>Sarcandra hainanensis</i>     | 0 | 5 | 7.23333E-06 | 1.64288E-10 | 9.22E+07 | 15 |
| <i>Sarcandra glabra</i>          | 0 | 5 | 7.18333E-06 | 1.62025E-10 | 8.07E+07 | 15 |
| <i>Chloranthus spicatus</i>      | 0 | 5 | 0.00000745  | 1.74278E-10 | 8.07E+07 | 15 |
| <i>Chloranthus erectus</i>       | 0 | 5 | 8.71667E-06 | 2.38578E-10 | 4.61E+07 | 15 |
| <i>Chloranthus serratus</i>      | 0 | 5 | 6.88333E-06 | 1.48774E-10 | 8.94E+07 | 15 |
| <i>Chloranthus henryi</i>        | 0 | 5 | 8.18333E-06 | 2.10276E-10 | 8.65E+07 | 15 |
| <i>Chloranthus sessilifolius</i> | 0 | 5 | 0.0000076   | 1.81366E-10 | 7.49E+07 | 15 |
| <i>Chloranthus oldhami</i>       | 0 | 5 | 0.000008    | 2.0096E-10  | 5.02E+07 | 15 |
| <i>Chloranthus nervosus</i>      | 0 | 5 | 7.46667E-06 | 1.75058E-10 | 6.34E+07 | 15 |
| <i>Chloranthus angustifolius</i> | 0 | 5 | 8.06667E-06 | 2.04323E-10 | 4.61E+07 | 15 |
| <i>Chloranthus japonicus</i>     | 0 | 5 | 8.13333E-06 | 2.07714E-10 | 4.32E+07 | 15 |

|                                                             |   |   |             |             |           |    |
|-------------------------------------------------------------|---|---|-------------|-------------|-----------|----|
| <i>Chloranthus fortunei</i>                                 | 0 | 5 | 7.88333E-06 | 1.95141E-10 | 2.77E+07  | 15 |
| <i>Hedyosmum orientale</i>                                  | 0 | 5 | 7.76667E-06 | 1.89408E-10 | 6.63E+07  | 15 |
| <i>Hedyosmum mexiconum</i>                                  | 0 | 5 | 7.23333E-06 | 1.64288E-10 | 9.22E+07  | 15 |
| <i>Ascarina lucida</i>                                      | 0 | 5 | 0.00000805  | 2.0348E-10  | 2.31E+07  | 15 |
| <i>Ascarina lanceolata</i>                                  | 0 | 5 | 8.08333E-06 | 2.05168E-10 | 4.04E+07  | 15 |
| <i>Acer campestre</i>                                       | 0 | 5 | 3.70E-06    | 4.29E-11    | 4.10E+08  | 4  |
| <i>Acer hyrcanum</i>                                        | 0 | 5 | 3.88E-06    | 4.72E-11    | 3.66E+08  | 4  |
| <i>Acer monspessulanum</i>                                  | 0 | 5 | 3.82E-06    | 4.57E-11    | 5.10E+08  | 4  |
| <i>Acer negundo</i>                                         | 0 | 5 | 2.36215E-06 | 1.75205E-11 | 3.40E+08  | 3  |
| <i>Acer saccharinum saccharinum</i>                         | 0 | 5 | 1.73256E-06 | 9.42557E-12 | 3.00E+08  | 3  |
| <i>Acer rubrum</i>                                          | 0 | 5 | 5.50457E-06 | 9.51428E-11 | 7.04E+08  | 3  |
| <i>Liquidambar styraciflua</i>                              | 0 | 5 | 2.67088E-06 | 2.23996E-11 | 2.24E+08  | 3  |
| <i>Astronium lecointei Ducke</i>                            | 0 | 5 | 2.08333E-06 | 1.36285E-11 | 652000000 | 4  |
| <i>Rhus copallina</i>                                       | 0 | 5 | 9.39614E-07 | 2.77223E-12 | 7.31E+08  | 3  |
| <i>Rhus capallina</i>                                       | 0 | 5 | 9.39614E-07 | 2.77223E-12 | 7.31E+08  | 3  |
| <i>Cotinus coggygria</i>                                    | 0 | 5 | 3.55E-06    | 3.95E-11    | 2.78E+08  | 2  |
| <i>Pistacia atlantica</i>                                   | 0 | 5 | 4.54E-06    | 6.46E-11    | 2.78E+08  | 2  |
| <i>Pistacia atlantica</i>                                   | 0 | 5 | 4.08705E-06 | 5.24505E-11 | 3.86E+08  | 3  |
| <i>Schinus molle</i>                                        | 0 | 5 | 3.93293E-06 | 4.85694E-11 | 1.41E+08  | 3  |
| <i>Schinus molle</i>                                        | 0 | 5 | 3.61477E-06 | 4.10289E-11 | 1.43E+08  | 3  |
| <i>Rhus coriana</i>                                         | 0 | 5 | 4.97E-06    | 7.75E-11    | 1.96E+08  | 2  |
| <i>Anisophyllea manausensis Pires &amp; W. A. Rodrigues</i> | 0 | 5 | 2.09167E-06 | 1.37377E-11 | 271000000 | 4  |
| <i>Asimina triloba</i>                                      | 0 | 5 | 4.40317E-06 | 6.08781E-11 | 6.50E+07  | 3  |
| <i>Pittosporum tobira</i>                                   | 0 | 5 | 3.30338E-06 | 3.42647E-11 | 3.68E+08  | 3  |
| <i>Pittosporum undulatum</i>                                | 0 | 5 | 2.67088E-06 | 2.23996E-11 | 3.39E+08  | 3  |
| <i>Pittosporum tobira</i>                                   | 0 | 5 | 3.14455E-06 | 3.10489E-11 | 4.15E+08  | 3  |
| <i>Pittosporum undulatum</i>                                | 0 | 5 | 2.83134E-06 | 2.51718E-11 | 5.57E+08  | 3  |
| <i>Geissospermum argenteum Woodson</i>                      | 0 | 5 | 2.08333E-06 | 1.36285E-11 | 477500000 | 4  |
| <i>Ilex opaca</i>                                           | 0 | 5 | 3.93293E-06 | 4.85694E-11 | 2.89E+08  | 3  |
| <i>Solidago altissima</i>                                   | 0 | 5 | 4.29193E-06 | 1.2885E-10  | 132810000 | 2  |
| <i>Xanthium pennsylvanicum</i>                              | 0 | 5 | 5.86789E-06 | 1.08117E-10 | 1.77E+08  | 3  |
| <i>Helianthus annuus</i>                                    | 0 | 5 | 5.72471E-06 | 1.02905E-10 | 1.75E+08  | 3  |
| <i>Alnus rugosa (seedling)</i>                              | 0 | 5 | 2.19958E-06 | 1.51918E-11 | 3.30E+08  | 3  |
| <i>Alnus rugosa (mature)</i>                                | 0 | 5 | 2.98909E-06 | 2.80549E-11 | 2.33E+08  | 3  |
| <i>Betula lenta</i>                                         | 0 | 5 | 5.03198E-06 | 7.95074E-11 | 1.60E+08  | 3  |
| <i>Betula lenta</i>                                         | 0 | 5 | 2.83134E-06 | 2.51718E-11 | 5.38E+08  | 3  |
| <i>Carpinus betulus</i>                                     | 0 | 5 | 5.20787E-06 | 8.51628E-11 | 1.70E+08  | 3  |
| <i>Carpinus caroliniana</i>                                 | 0 | 5 | 2.67088E-06 | 2.23996E-11 | 2.34E+08  | 3  |
| <i>Corylus americana</i>                                    | 0 | 5 | 5.81651E-06 | 1.06232E-10 | 3.47E+08  | 3  |
| <i>Corylus americana</i>                                    | 0 | 5 | 5.81651E-06 | 1.06232E-10 | 3.47E+08  | 3  |

|                                         |   |   |             |             |           |   |
|-----------------------------------------|---|---|-------------|-------------|-----------|---|
| <i>Jacaranda copaia</i> (Aubl.) D. Don  | 0 | 5 | 2.91667E-06 | 2.67118E-11 | 389800000 | 4 |
| <i>Asperugo procumbens</i>              | 0 | 5 | 3.82E-06    | 4.58E-11    | 2.18E+08  | 2 |
| <i>Bugloss ides arvensis</i>            | 0 | 5 | 4.51E-06    | 6.37E-11    | 1.88E+08  | 2 |
| <i>Heliotropium ellipticum</i>          | 0 | 5 | 4.62E-06    | 6.71E-11    | 2.10E+08  | 2 |
| <i>Lappula barbata</i>                  | 0 | 5 | 4.31E-06    | 5.84E-11    | 1.91E+08  | 2 |
| <i>Myosotis silvatica</i>               | 0 | 5 | 4.29E-06    | 5.77E-11    | 1.72E+08  | 2 |
| <i>Onosma dichroanthum</i>              | 0 | 5 | 3.35E-06    | 3.53E-11    | 4.97E+08  | 2 |
| <i>Onosma microcarpum</i>               | 0 | 5 | 4.06E-06    | 5.18E-11    | 2.98E+08  | 2 |
| <i>Symphytum asperum</i>                | 0 | 5 | 4.50E-06    | 6.37E-11    | 2.57E+08  | 2 |
| <i>Protium crassipetalum</i> Cuatrec.,  | 0 | 5 | 9.17E-07    | 2.63847E-12 | 581000000 | 4 |
| <i>Protium decandrum</i> (Aubl.) Marsh. | 0 | 5 | 1.25E-06    | 4.90625E-12 | 588500000 | 4 |
| <i>Protium klugii</i> J.F. Macbr.       | 0 | 5 | 1.67E-06    | 8.72222E-12 | 589300000 | 4 |
| <i>Campanula glomerata</i>              | 0 | 5 | 5.51E-06    | 9.52E-11    | 1.79E+08  | 3 |
| <i>Campanula hohenackeri</i>            | 0 | 5 | 5.00E-06    | 7.87E-11    | 1.65E+08  | 3 |
| <i>Campanula rapunculoides</i>          | 0 | 5 | 5.03E-06    | 7.93E-11    | 2.41E+08  | 3 |
| <i>Campanula stevenii</i>               | 0 | 5 | 5.79E-06    | 1.05E-10    | 1.46E+08  | 3 |
| <i>Symphyandra armena</i>               | 0 | 5 | 4.26E-06    | 5.70E-11    | 2.00E+08  | 3 |
| <i>Celtis tenuifolia</i>                | 0 | 5 | 2.83E-06    | 2.51718E-11 | 1.80E+08  | 3 |
| <i>Celtis occidentalis</i>              | 0 | 5 | 2.04E-06    | 1.30849E-11 | 2.72E+08  | 3 |
| <i>Lonicera caucasica</i>               | 0 | 5 | 3.56E-06    | 3.99E-11    | 3.65E+08  | 2 |
| <i>Lonicera iberica</i>                 | 0 | 5 | 4.08E-06    | 5.23E-11    | 2.24E+08  | 2 |
| <i>Viburnum lantana</i>                 | 0 | 5 | 5.36E-06    | 9.04E-11    | 1.43E+08  | 2 |
| <i>Arenaria dianthoides</i>             | 0 | 5 | 6.09E-06    | 1.16E-10    | 1.23E+08  | 2 |
| <i>Arenaria gypsophiloides</i>          | 0 | 5 | 5.65E-06    | 1.00E-10    | 9.50E+07  | 2 |
| <i>Arenaria serpyllifolia</i>           | 0 | 5 | 4.64E-06    | 6.76E-11    | 1.67E+08  | 2 |
| <i>Cerastium glomeratum</i>             | 0 | 5 | 6.70E-06    | 1.41E-10    | 8.24E+07  | 2 |
| <i>Cerastium holosteoides</i>           | 0 | 5 | 6.03E-06    | 1.14E-10    | 9.20E+07  | 2 |
| <i>Cerastium szowitzii</i>              | 0 | 5 | 5.91E-06    | 1.10E-10    | 1.30E+08  | 2 |
| <i>Dianthus cretaceus</i>               | 0 | 5 | 5.53E-06    | 9.59E-11    | 8.60E+07  | 2 |
| <i>Dianthus crinitus</i>                | 0 | 5 | 5.86E-06    | 1.08E-10    | 8.30E+07  | 2 |
| <i>Gypsophila elegans</i>               | 0 | 5 | 5.19E-06    | 8.47E-11    | 9.60E+07  | 2 |
| <i>Herniaria hirsuta</i>                | 0 | 5 | 5.19E-06    | 8.47E-11    | 8.50E+07  | 2 |
| <i>Herniaria incana</i>                 | 0 | 5 | 4.36E-06    | 5.96E-11    | 9.90E+07  | 2 |
| <i>Minuartia acuminata</i>              | 0 | 5 | 5.70E-06    | 1.02E-10    | 7.10E+07  | 2 |
| <i>Minuartia lineata</i>                | 0 | 5 | 5.06E-06    | 8.03E-11    | 8.20E+07  | 2 |
| <i>Minuartia recurva</i>                | 0 | 5 | 5.03E-06    | 7.93E-11    | 1.10E+08  | 2 |
| <i>Silene persica</i>                   | 0 | 5 | 5.86E-06    | 1.08E-10    | 1.06E+08  | 2 |
| <i>Silene ruprechtii</i>                | 0 | 5 | 5.03E-06    | 7.93E-11    | 1.66E+08  | 2 |
| <i>Silene spergulifolia</i>             | 0 | 5 | 5.03E-06    | 7.93E-11    | 1.04E+08  | 2 |
| <i>Stellaria media</i>                  | 0 | 5 | 6.90E-06    | 1.50E-10    | 4.50E+07  | 2 |
| <i>Chenopodium album</i>                | 0 | 5 | 4.77E-06    | 7.16E-11    | 1.23E+08  | 2 |



|                                     |   |   |          |             |           |   |
|-------------------------------------|---|---|----------|-------------|-----------|---|
| <i>Kochia prostrata</i>             | 0 | 5 | 4.88E-06 | 7.46E-11    | 7.82E+07  | 2 |
| <i>Noaea mucronata</i>              | 0 | 5 | 4.07E-06 | 5.20E-11    | 1.51E+08  | 2 |
| <i>Licania adolphoduckei</i> Prance | 0 | 5 | 1.67E-06 | 8.80966E-12 | 458000000 | 4 |
| <i>Fumana procumbens</i>            | 0 | 5 | 6.44E-06 | 1.30E-10    | 8.19E+07  | 2 |
| <i>Helinthemum ledifolium</i>       | 0 | 5 | 4.45E-06 | 6.21E-11    | 3.36E+08  | 2 |
| <i>Helinthemum nummularium</i>      | 0 | 5 | 4.80E-06 | 7.23E-11    | 2.31E+08  | 2 |
| <i>Helinthemum salicifolium</i>     | 0 | 5 | 5.05E-06 | 8.01E-11    | 1.38E+08  | 2 |
| <i>Achillea biebersteinii</i>       | 0 | 5 | 5.47E-06 | 9.40E-11    | 3.70E+07  | 2 |
| <i>Achillea millefolium</i>         | 0 | 5 | 5.92E-06 | 1.10E-10    | 3.97E+07  | 2 |
| <i>Artemisia triumfettii</i>        | 0 | 5 | 5.96E-06 | 1.12E-10    | 7.27E+07  | 2 |
| <i>Artemisia absinthium</i>         | 0 | 5 | 5.67E-06 | 1.01E-10    | 1.21E+08  | 2 |
| <i>Artemisia armenuica</i>          | 0 | 5 | 4.10E-06 | 5.27E-11    | 2.76E+08  | 2 |
| <i>Artemisia chamaemellifolia</i>   | 0 | 5 | 5.56E-06 | 9.70E-11    | 1.28E+08  | 2 |
| <i>Artemisia fragrans</i>           | 0 | 5 | 4.51E-06 | 6.40E-11    | 1.42E+08  | 2 |
| <i>Artemisia scoparia</i>           | 0 | 5 | 4.46E-06 | 6.24E-11    | 1.31E+08  | 2 |
| <i>Artemisia splendens</i>          | 0 | 5 | 6.04E-06 | 1.14E-10    | 1.08E+08  | 2 |
| <i>Calendula persicaria</i>         | 0 | 5 | 7.52E-06 | 1.77E-10    | 5.70E+07  | 2 |
| <i>Carduus pycnocephalus</i>        | 0 | 5 | 5.19E-06 | 8.47E-11    | 2.19E+08  | 2 |
| <i>Carduus seminidus</i>            | 0 | 5 | 5.77E-06 | 1.04E-10    | 1.27E+08  | 2 |
| <i>Carduus thoermeri</i>            | 0 | 5 | 4.12E-06 | 5.33E-11    | 3.39E+08  | 2 |
| <i>Carthamus lanatus</i>            | 0 | 5 | 4.58E-06 | 6.60E-11    | 2.46E+08  | 2 |
| <i>Centanrea aziziana</i>           | 0 | 5 | 4.02E-06 | 5.07E-11    | 1.62E+08  | 2 |
| <i>Centanrea macrocephala</i>       | 0 | 5 | 4.22E-06 | 5.60E-11    | 1.81E+08  | 2 |
| <i>Centanrea rhizantha</i>          | 0 | 5 | 4.36E-06 | 5.98E-11    | 2.38E+08  | 2 |
| <i>Centanrea solstitialis</i>       | 0 | 5 | 2.87E-06 | 2.59E-11    | 1.97E+08  | 2 |
| <i>Centanrea sosnovskyi</i>         | 0 | 5 | 5.49E-06 | 9.46E-11    | 1.58E+08  | 2 |
| <i>Centanrea zuvandica</i>          | 0 | 5 | 4.01E-06 | 5.06E-11    | 4.10E+08  | 2 |
| <i>Cirsium echinus</i>              | 0 | 5 | 4.32E-06 | 5.86E-11    | 3.12E+08  | 2 |
| <i>Cirsium osseticum</i>            | 0 | 5 | 3.39E-06 | 3.61E-11    | 3.34E+08  | 2 |
| <i>Cansinia belangeri</i>           | 0 | 5 | 4.04E-06 | 5.13E-11    | 1.95E+08  | 2 |
| <i>Crepis foetida</i>               | 0 | 5 | 5.17E-06 | 8.38E-11    | 1.79E+08  | 2 |
| <i>Crepis sancta</i>                | 0 | 5 | 5.09E-06 | 8.12E-11    | 2.06E+08  | 2 |
| <i>Crupina crupinastrum</i>         | 0 | 5 | 5.29E-06 | 8.79E-11    | 8.82E+07  | 2 |
| <i>Doroncum hyrcanum</i>            | 0 | 5 | 6.06E-06 | 1.15E-10    | 9.10E+07  | 2 |
| <i>Erigeron acer</i>                | 0 | 5 | 5.19E-06 | 8.45E-11    | 9.94E+07  | 2 |
| <i>Filago pyramidata</i>            | 0 | 5 | 4.05E-06 | 5.15E-11    | 1.14E+08  | 2 |
| <i>Helichrysum plicatum</i>         | 0 | 5 | 3.77E-06 | 4.46E-11    | 1.62E+08  | 2 |
| <i>Hieracium pilosella</i>          | 0 | 5 | 4.52E-06 | 6.42E-11    | 2.11E+08  | 2 |
| <i>Hieracium procerum</i>           | 0 | 5 | 5.47E-06 | 9.40E-11    | 9.46E+07  | 2 |
| <i>Inula oculus-christii</i>        | 0 | 5 | 4.49E-06 | 6.33E-11    | 1.70E+08  | 2 |
| <i>Inula vulgaris</i>               | 0 | 5 | 4.39E-06 | 6.05E-11    | 1.83E+08  | 2 |

|                                        |   |   |          |             |          |   |
|----------------------------------------|---|---|----------|-------------|----------|---|
| <i>Koelpinia linearis</i>              | 0 | 5 | 5.14E-06 | 8.29E-11    | 9.59E+07 | 2 |
| <i>Lapsana communis</i>                | 0 | 5 | 4.54E-06 | 6.48E-11    | 1.14E+08 | 2 |
| <i>Leontodon asperrimus</i>            | 0 | 5 | 5.32E-06 | 8.89E-11    | 1.38E+08 | 2 |
| <i>Scorzonera laciniata</i>            | 0 | 5 | 5.18E-06 | 8.41E-11    | 1.52E+08 | 2 |
| <i>Serratula quinquefolia</i>          | 0 | 5 | 4.08E-06 | 5.22E-11    | 2.07E+08 | 2 |
| <i>Sonchus asper</i>                   | 0 | 5 | 4.91E-06 | 7.58E-11    | 4.22E+07 | 2 |
| <i>Tanacetum chiliophyllum</i>         | 0 | 5 | 6.14E-06 | 1.18E-10    | 6.62E+07 | 2 |
| <i>Tanacetum parthenium</i>            | 0 | 5 | 5.72E-06 | 1.03E-10    | 5.82E+07 | 2 |
| <i>Tanacetum graminifolius</i>         | 0 | 5 | 4.10E-06 | 5.29E-11    | 1.37E+08 | 2 |
| <i>Tragopogon kemulariae</i>           | 0 | 5 | 4.67E-06 | 6.86E-11    | 9.67E+07 | 2 |
| <i>Tragopogon pterocarpus</i>          | 0 | 5 | 4.86E-06 | 7.41E-11    | 8.86E+07 | 2 |
| <i>Tragopogon reticulatus</i>          | 0 | 5 | 5.28E-06 | 8.74E-11    | 1.21E+08 | 2 |
| <i>Xeranthemum anuum</i>               | 0 | 5 | 3.43E-06 | 3.69E-11    | 1.84E+08 | 2 |
| <i>Convolvulus arvensis</i>            | 0 | 5 | 4.29E-06 | 5.78E-11    | 1.90E+08 | 2 |
| <i>Convolvulus cantabrica</i>          | 0 | 5 | 4.52E-06 | 6.42E-11    | 1.57E+08 | 2 |
| <i>Convolvulus lineatus</i>            | 0 | 5 | 4.79E-06 | 7.21E-11    | 1.64E+08 | 2 |
| <i>Cornus florida</i>                  | 0 | 5 | 5.03E-06 | 7.95074E-11 | 8.30E+07 | 3 |
| <i>Cornus alternifolia</i>             | 0 | 5 | 3.14E-06 | 3.10489E-11 | 1.80E+08 | 3 |
| <i>Cornus florida</i>                  | 0 | 5 | 5.03E-06 | 7.95074E-11 | 8.30E+07 | 3 |
| <i>Cornus australis</i>                | 0 | 5 | 4.09E-06 | 5.24E-11    | 1.72E+08 | 2 |
| <i>Cornus mas</i>                      | 0 | 5 | 5.34E-06 | 8.94E-11    | 9.35E+07 | 2 |
| <i>Carpinus betulus</i>                | 0 | 5 | 4.91E-06 | 7.56E-11    | 1.37E+08 | 2 |
| <i>Corylus avellana</i>                | 0 | 5 | 4.37E-06 | 5.99E-11    | 1.02E+08 | 2 |
| <i>Sedum spurium</i>                   | 0 | 5 | 5.86E-06 | 1.08E-10    | 5.73E+07 | 2 |
| <i>Sedum rubrocinctum</i>              | 0 | 5 | 5.25E-06 | 8.65E-11    | 3.69E+07 | 2 |
| <i>Sedum spectabilis</i>               | 0 | 5 | 6.01E-06 | 1.13439E-10 | 3.50E+07 | 3 |
| <i>Alliaria petiolata</i>              | 0 | 5 | 3.44E-06 | 3.72E-11    | 1.63E+08 | 2 |
| <i>Alyssum desertorum</i>              | 0 | 5 | 4.41E-06 | 6.11E-11    | 1.90E+08 | 2 |
| <i>Alyssum linifolium</i>              | 0 | 5 | 3.68E-06 | 4.25E-11    | 4.73E+08 | 2 |
| <i>Alyssum longistylum</i>             | 0 | 5 | 3.71E-06 | 4.33E-11    | 2.11E+08 | 2 |
| <i>Alyssum minutum</i>                 | 0 | 5 | 4.26E-06 | 5.71E-11    | 2.64E+08 | 2 |
| <i>Alyssum sibiricum</i>               | 0 | 5 | 3.65E-06 | 4.18E-11    | 2.80E+08 | 2 |
| <i>Alyssum strigosum</i>               | 0 | 5 | 4.13E-06 | 5.35E-11    | 2.10E+08 | 2 |
| <i>Arabis sagittata</i>                | 0 | 5 | 2.96E-06 | 2.76E-11    | 2.83E+08 | 2 |
| <i>Clypeola jonthlaspi</i>             | 0 | 5 | 3.41E-06 | 3.64E-11    | 1.90E+08 | 2 |
| <i>Erysimum subulatum</i>              | 0 | 5 | 4.20E-06 | 5.55E-11    | 2.23E+08 | 2 |
| <i>Hesperis hyrcana</i>                | 0 | 5 | 6.64E-06 | 1.38E-10    | 6.20E+07 | 2 |
| <i>Neslia apiculata</i>                | 0 | 5 | 3.77E-06 | 4.46E-11    | 3.20E+08 | 2 |
| <i>Rapistrum rugosum</i>               | 0 | 5 | 3.80E-06 | 4.54E-11    | 3.37E+08 | 2 |
| <i>Sterigmostemum contortuplicatum</i> | 0 | 5 | 5.52E-06 | 9.55E-11    | 1.40E+08 | 2 |
| <i>Thlaspi arvensis</i>                | 0 | 5 | 3.37E-06 | 3.57E-11    | 2.11E+08 | 2 |

|                                          |   |   |             |             |           |   |
|------------------------------------------|---|---|-------------|-------------|-----------|---|
| <i>Turritis glabra</i>                   | 0 | 5 | 4.01E-06    | 5.04E-11    | 8.83E+07  | 2 |
| <i>Scabiosa amoena</i>                   | 0 | 5 | 5.01E-06    | 7.90E-11    | 1.54E+08  | 2 |
| <i>Scabiosa caucasica</i>                | 0 | 5 | 6.41E-06    | 1.29E-10    | 1.25E+08  | 2 |
| <i>Scabiosa crinita</i>                  | 0 | 5 | 5.04E-06    | 7.96E-11    | 2.95E+08  | 2 |
| <i>Scabiosa olivieri</i>                 | 0 | 5 | 3.74E-06    | 4.39E-11    | 2.54E+08  | 2 |
| <i>Scabiosa persica</i>                  | 0 | 5 | 5.61E-06    | 9.90E-11    | 1.84E+08  | 2 |
| <i>Cephalaria hirsuta</i>                | 0 | 5 | 6.99E-06    | 1.53E-10    | 8.58E+07  | 2 |
| <i>Diospyros virginiana</i>              | 0 | 5 | 3.14455E-06 | 3.10489E-11 | 2.62E+08  | 3 |
| <i>Kalmia latifolia</i>                  | 0 | 5 | 3.77252E-06 | 4.46883E-11 | 1.75E+08  | 3 |
| <i>Oxydendron arboreum</i>               | 0 | 5 | 2.98909E-06 | 2.80549E-11 | 3.05E+08  | 3 |
| <i>Ricinus communis</i>                  | 0 | 5 | 5.67514E-06 | 1.01131E-10 | 2.70E+08  | 3 |
| <i>Cercis canadensis</i>                 | 0 | 5 | 2.67088E-06 | 2.23996E-11 | 2.66E+08  | 3 |
| <i>Swartzia ingifolia Ducke</i>          | 0 | 5 | 0.0000025   | 1.9625E-11  | 543800000 | 4 |
| <i>Inga umbratica Poepp. &amp; Endl.</i> | 0 | 5 | 0.0000025   | 1.9625E-11  | 395700000 | 4 |
| <i>Gleditsia triacanthos</i>             | 0 | 5 | 3.30338E-06 | 3.42647E-11 | 2.75E+08  | 3 |
| <i>Gymnocladus dioicus</i>               | 0 | 5 | 2.83134E-06 | 2.51718E-11 | 7.90E+07  | 3 |
| <i>Medicago sativa</i>                   | 0 | 5 | 3.87413E-06 | 4.71278E-11 | 1.88E+08  | 3 |
| <i>Vicia faba</i>                        | 0 | 5 | 6.37277E-06 | 1.27522E-10 | 7.50E+07  | 3 |
| <i>Acacia longifolia</i>                 | 0 | 5 | 3.46003E-06 | 3.75914E-11 | 1.04E+08  | 3 |
| <i>Acacia cyanophylla</i>                | 0 | 5 | 4.24389E-06 | 5.65534E-11 | 3.07E+08  | 3 |
| <i>Acacia cyanophylla</i>                | 0 | 5 | 4.08705E-06 | 5.24505E-11 | 3.98E+08  | 3 |
| <i>Castanea dentata</i>                  | 0 | 5 | 4.08705E-06 | 5.24505E-11 | 2.80E+08  | 3 |
| <i>Castanea dentata</i>                  | 0 | 5 | 6.13274E-06 | 1.18097E-10 | 4.18E+08  | 3 |
| <i>Robinia pseudoacacia (seedling)</i>   | 0 | 5 | 7.97289E-07 | 1.996E-12   | 1.25E+08  | 3 |
| <i>Robinia pseudoacacia (mature)</i>     | 0 | 5 | 1.73256E-06 | 9.42557E-12 | 1.91E+08  | 3 |
| <i>Quercus macranthera</i>               | 0 | 5 | 4.29E-06    | 5.77E-11    | 5.59E+08  | 2 |
| <i>Quercus petraea</i>                   | 0 | 5 | 4.20E-06    | 5.55E-11    | 6.13E+08  | 2 |
| <i>Quercus valutina</i>                  | 0 | 5 | 7.86137E-06 | 1.94056E-10 | 4.05E+08  | 3 |
| <i>Quercus palustris</i>                 | 0 | 5 | 1.57227E-06 | 7.76223E-12 | 9.09E+08  | 3 |
| <i>Quercus robur</i>                     | 0 | 5 | 4.21886E-06 | 5.58881E-11 | 3.40E+08  | 3 |
| <i>Quercus velutina</i>                  | 0 | 5 | 4.32222E-06 | 5.86603E-11 | 4.50E+08  | 3 |
| <i>Quercus macrocarpa</i>                | 0 | 5 | 3.46003E-06 | 3.75914E-11 | 4.60E+08  | 3 |
| <i>Quercus alba (seedling)</i>           | 0 | 5 | 2.36215E-06 | 1.75205E-11 | 6.24E+08  | 3 |
| <i>Quercus alba (mature)</i>             | 0 | 5 | 3.14455E-06 | 3.10489E-11 | 5.14E+08  | 3 |
| <i>Quercus coccinea</i>                  | 0 | 5 | 2.67088E-06 | 2.23996E-11 | 7.59E+08  | 3 |
| <i>Quercus palustris (seedling)</i>      | 0 | 5 | 3.30338E-06 | 3.42647E-11 | 5.39E+08  | 3 |
| <i>Quercus pallustrus (mature)</i>       | 0 | 5 | 1.57227E-06 | 7.76223E-12 | 9.09E+08  | 3 |
| <i>Quercus phellos</i>                   | 0 | 5 | 2.36215E-06 | 1.75205E-11 | 7.55E+08  | 3 |
| <i>Quercus prinus (seedling)</i>         | 0 | 5 | 2.67088E-06 | 2.23996E-11 | 2.57E+08  | 3 |
| <i>Quercus prinus (mature)</i>           | 0 | 5 | 2.98909E-06 | 2.80549E-11 | 6.61E+08  | 3 |
| <i>Quercus rubra (seedling)</i>          | 0 | 5 | 2.98909E-06 | 2.80549E-11 | 6.64E+08  | 3 |

|                                   |   |   |             |             |          |   |
|-----------------------------------|---|---|-------------|-------------|----------|---|
| <i>Quercus rubra (mature)</i>     | 0 | 5 | 3.61477E-06 | 4.10289E-11 | 6.81E+08 | 3 |
| <i>Quercus stellata</i>           | 0 | 5 | 5.03198E-06 | 7.95074E-11 | 4.24E+08 | 3 |
| <i>Quercus valutina</i>           | 0 | 5 | 7.86137E-06 | 1.94056E-10 | 4.05E+08 |   |
| <i>Gentiana cruciata</i>          | 0 | 5 | 6.54E-06    | 1.34E-10    | 8.37E+07 | 2 |
| <i>Gentiana gelida</i>            | 0 | 5 | 6.84E-06    | 1.47E-10    | 5.54E+07 | 2 |
| <i>Erodium cicutarium</i>         | 0 | 5 | 4.36E-06    | 5.96E-11    | 2.02E+08 | 2 |
| <i>Geranium lucidum</i>           | 0 | 5 | 4.32E-06    | 5.87E-11    | 2.26E+08 | 2 |
| <i>Geranium prateuse</i>          | 0 | 5 | 4.50E-06    | 6.36E-11    | 2.73E+08 | 2 |
| <i>Geranium robertianum</i>       | 0 | 5 | 4.10E-06    | 5.28E-11    | 1.15E+08 | 2 |
| <i>Geranium rotundifolium</i>     | 0 | 5 | 4.44E-06    | 6.19E-11    | 1.05E+08 | 2 |
| <i>Pelargonium zonale</i>         | 0 | 5 | 7.68418E-06 | 1.85406E-10 | 1.79E+08 | 3 |
| <i>Hamamelis virginiana</i>       | 0 | 5 | 4.24389E-06 | 5.65534E-11 | 1.68E+08 | 3 |
| <i>Hypericum hirsutum</i>         | 0 | 5 | 4.18E-06    | 5.49E-11    | 1.61E+08 | 2 |
| <i>Hypericum linarioides</i>      | 0 | 5 | 4.03E-06    | 5.10E-11    | 2.29E+08 | 2 |
| <i>Hypericum perforatum</i>       | 0 | 5 | 4.08E-06    | 5.23E-11    | 2.62E+08 | 2 |
| <i>Carya cordiformis</i>          | 0 | 5 | 3.30338E-06 | 3.42647E-11 | 3.25E+08 | 3 |
| <i>Carya glabra</i>               | 0 | 5 | 2.83134E-06 | 2.51718E-11 | 3.81E+08 | 3 |
| <i>Carya ovata (seedling)</i>     | 0 | 5 | 2.51424E-06 | 1.98491E-11 | 2.44E+08 | 3 |
| <i>Carya ovata (mature)</i>       | 0 | 5 | 3.93293E-06 | 4.85694E-11 | 3.49E+08 | 3 |
| <i>Carya tomentosa (seedling)</i> | 0 | 5 | 2.83134E-06 | 2.51718E-11 | 3.45E+08 | 3 |
| <i>Carya tomentosa (mature)</i>   | 0 | 5 | 3.93293E-06 | 4.85694E-11 | 2.40E+08 | 3 |
| <i>Juglans nigra</i>              | 0 | 5 | 3.61477E-06 | 4.10289E-11 | 2.60E+08 | 3 |
| <i>Juglans nigra (seedling)</i>   | 0 | 5 | 2.19958E-06 | 1.51918E-11 | 2.78E+08 | 3 |
| <i>Juglans nigra (mature)</i>     | 0 | 5 | 2.51424E-06 | 1.98491E-11 | 2.55E+08 | 3 |
| <i>Juglans cinerea</i>            | 0 | 5 | 2.98909E-06 | 2.80549E-11 | 1.11E+08 | 3 |
| <i>Ajuga comata</i>               | 0 | 5 | 4.44E-06    | 6.19E-11    | 1.54E+08 | 2 |
| <i>Ajuga orientalis</i>           | 0 | 5 | 4.43E-06    | 6.16E-11    | 2.28E+08 | 2 |
| <i>Betonica grandiflora</i>       | 0 | 5 | 4.93E-06    | 7.64E-11    | 2.20E+08 | 2 |
| <i>Clinopodium vulgare</i>        | 0 | 5 | 3.84E-06    | 4.62E-11    | 2.01E+08 | 2 |
| <i>Lamium album</i>               | 0 | 5 | 4.82E-06    | 7.28E-11    | 2.46E+08 | 2 |
| <i>Lamium amplexicanle</i>        | 0 | 5 | 4.86E-06    | 7.41E-11    | 1.86E+08 | 2 |
| <i>Marrubium astracanicum</i>     | 0 | 5 | 3.44E-06    | 3.72E-11    | 2.76E+08 | 2 |
| <i>Mentha longifolia</i>          | 0 | 5 | 4.22E-06    | 5.58E-11    | 2.29E+08 | 2 |
| <i>Nepeta betonicifolia</i>       | 0 | 5 | 4.08E-06    | 5.24E-11    | 1.75E+08 | 2 |
| <i>Nepeta hausskuechtii</i>       | 0 | 5 | 3.92E-06    | 4.83E-11    | 2.88E+08 | 2 |
| <i>Origanum vulgare</i>           | 0 | 5 | 3.88E-06    | 4.73E-11    | 2.53E+08 | 2 |
| <i>Phlomis herba-venti</i>        | 0 | 5 | 4.71E-06    | 6.96E-11    | 2.15E+08 | 2 |
| <i>Phlomis tuberosa</i>           | 0 | 5 | 3.65E-06    | 4.18E-11    | 3.44E+08 | 2 |
| <i>Prunella vulgaris</i>          | 0 | 5 | 5.11E-06    | 8.21E-11    | 1.95E+08 | 2 |
| <i>Salvia atropatana</i>          | 0 | 5 | 3.98E-06    | 4.97E-11    | 2.72E+08 | 2 |
| <i>Salvia uemorosa</i>            | 0 | 5 | 4.13E-06    | 5.36E-11    | 3.08E+08 | 2 |

|                                                       |   |   |             |             |           |   |
|-------------------------------------------------------|---|---|-------------|-------------|-----------|---|
| <i>Salvia sclarea</i>                                 | 0 | 5 | 3.59E-06    | 4.05E-11    | 3.20E+08  | 2 |
| <i>Salvia verticillata</i>                            | 0 | 5 | 3.96E-06    | 4.92E-11    | 4.37E+08  | 2 |
| <i>Salvia viridis</i>                                 | 0 | 5 | 4.30E-06    | 5.80E-11    | 2.13E+08  | 2 |
| <i>Satureja macrantha</i>                             | 0 | 5 | 4.23E-06    | 5.62E-11    | 9.04E+07  | 2 |
| <i>Scutellaria pinnatifida</i>                        | 0 | 5 | 3.50E-06    | 3.86E-11    | 4.28E+08  | 2 |
| <i>Sideritis montana</i>                              | 0 | 5 | 4.78E-06    | 7.18E-11    | 1.18E+08  | 2 |
| <i>Stachys asterocalyx</i>                            | 0 | 5 | 4.15E-06    | 5.42E-11    | 2.81E+08  | 2 |
| <i>Stachys byzanthiana</i>                            | 0 | 5 | 3.99E-06    | 5.00E-11    | 2.86E+08  | 2 |
| <i>Stachys lavandulifolia</i>                         | 0 | 5 | 4.33E-06    | 5.90E-11    | 1.77E+08  | 2 |
| <i>Stachys schtschegleevii</i>                        | 0 | 5 | 3.41E-06    | 3.64E-11    | 4.00E+08  | 2 |
| <i>Teucrium chamaedrys</i>                            | 0 | 5 | 4.65E-06    | 6.79E-11    | 2.91E+08  | 2 |
| <i>Teucrium polium</i>                                | 0 | 5 | 3.55E-06    | 3.96E-11    | 3.12E+08  | 2 |
| <i>Thymus kotschyanus</i>                             | 0 | 5 | 4.19E-06    | 5.51E-11    | 1.74E+08  | 2 |
| <i>Ziziphora capitata</i>                             | 0 | 5 | 3.75E-06    | 4.40E-11    | 2.80E+08  | 2 |
| <i>Ziziphora clinopodioides</i>                       | 0 | 5 | 3.97E-06    | 4.94E-11    | 2.48E+08  | 2 |
| <i>Sassafras albidum</i>                              | 0 | 5 | 2.74907E-06 | 2.37302E-11 | 2.25E+08  | 3 |
| <i>Sassafras albidum</i>                              | 0 | 5 | 2.83134E-06 | 2.51718E-11 | 3.06E+08  | 3 |
| <i>Licaria chrysophylla (Meisn.) Kosterm.</i>         | 0 | 5 | 1.66667E-06 | 8.72222E-12 | 314000000 | 4 |
| <i>Licaria rodriguesii Kurz</i>                       | 0 | 5 | 0.00001425  | 6.37616E-12 | 367000000 | 4 |
| <i>Lecythis prancei S.A. Moni</i>                     | 0 | 5 | 0.00000195  | 1.19399E-11 | 280600000 | 2 |
| <i>Couratari tauari O. Berg.</i>                      | 0 | 5 | 0.0000025   | 1.9625E-11  | 223500000 | 2 |
| <i>Eschweilera apiculata (Miers) A. C. Sm.</i>        | 0 | 5 | 2.33333E-06 | 1.70956E-11 | 442000000 | 2 |
| <i>Eschweilera bracteosa (Poepp. ex O. Berg) Mier</i> | 0 | 5 | 2.08333E-06 | 1.36285E-11 | 657500000 | 2 |
| <i>Eschweilera coriacea (DC.) S.A. Mori</i>           | 0 | 5 | 0.000002125 | 1.41791E-11 | 406000000 | 2 |
| <i>Eschweilera parviflora (Aubl.) Miers</i>           | 0 | 5 | 0.000001875 | 1.10391E-11 | 333400000 | 2 |
| <i>Linum nervosum</i>                                 | 0 | 5 | 5.22E-06    | 8.56E-11    | 7.27E+07  | 2 |
| <i>Linum nodiflorum</i>                               | 0 | 5 | 6.63E-06    | 1.38E-10    | 6.74E+07  | 2 |
| <i>Linum tenuifolium</i>                              | 0 | 5 | 5.46E-06    | 9.37E-11    | 1.41E+07  | 2 |
| <i>Antonia ovata Pohl.</i>                            | 0 | 5 | 2.50833E-06 | 1.97561E-11 | 288000000 | 4 |
| <i>Liriodendron tulipifera</i>                        | 0 | 5 | 2.83134E-06 | 2.51718E-11 | 2.84E+08  | 3 |
| <i>Magnolia acuminata</i>                             | 0 | 5 | 5.34507E-06 | 8.97092E-11 | 1.27E+08  | 3 |
| <i>Magnolia grandiflora</i>                           | 0 | 5 | 7.86137E-06 | 1.94056E-10 | 2.55E+08  | 3 |
| <i>Magnolia tripetala</i>                             | 0 | 5 | 4.08705E-06 | 5.24505E-11 | 1.61E+08  | 3 |
| <i>Tilia americana</i>                                | 0 | 5 | 4.08705E-06 | 5.24505E-11 | 8.91E+08  | 3 |
| <i>Tilia europa</i>                                   | 0 | 5 | 3.98644E-06 | 4.99001E-11 | 3.70E+08  | 3 |
| <i>Tilia americana</i>                                | 0 | 5 | 3.53575E-06 | 3.92547E-11 | 1.20E+08  | 3 |
| <i>Tilia americana</i>                                | 0 | 5 | 4.08705E-06 | 5.24505E-11 | 8.90E+07  | 3 |
| <i>Scleronema micranthum (Ducke) Ducke</i>            | 0 | 5 | 0.0000025   | 1.9625E-11  | 526200000 | 4 |
| <i>Melia azedarach</i>                                | 0 | 5 | 2.98909E-06 | 2.80549E-11 | 3.74E+08  | 3 |
| <i>Melia azedarach</i>                                | 0 | 5 | 2.51424E-06 | 1.98491E-11 | 4.23E+08  | 3 |

|                                            |   |   |             |             |           |   |
|--------------------------------------------|---|---|-------------|-------------|-----------|---|
| <i>Morus rubra</i>                         | 0 | 5 | 2.67088E-06 | 2.23996E-11 | 1.54E+08  | 3 |
| <i>Callistemon laurifolia</i>              | 0 | 5 | 4.08705E-06 | 5.24505E-11 | 3.61E+08  | 3 |
| <i>Callistemon rigidus</i>                 | 0 | 5 | 5.50457E-06 | 9.51428E-11 | 2.59E+08  | 3 |
| <i>Eucalyptus globulus</i>                 | 0 | 5 | 5.01793E-06 | 7.90639E-11 | 3.70E+08  | 3 |
| <i>Eucalyptus albens</i>                   | 0 | 5 | 4.71682E-06 | 6.98601E-11 | 1.28E+08  | 3 |
| <i>Eucalyptus blakelyi</i>                 | 0 | 5 | 2.98909E-06 | 2.80549E-11 | 3.54E+08  | 3 |
| <i>Eucalyptus cinerea</i>                  | 0 | 5 | 3.46003E-06 | 3.75914E-11 | 2.33E+08  | 3 |
| <i>Eucalyptus ficifolia</i>                | 0 | 5 | 3.46003E-06 | 3.75914E-11 | 3.28E+08  | 3 |
| <i>Eucalyptus maculata</i>                 | 0 | 5 | 6.13274E-06 | 1.18097E-10 | 2.42E+08  | 3 |
| <i>Eucalyptus maideni</i>                  | 0 | 5 | 9.11958E-06 | 2.61144E-10 | 3.60E+07  | 3 |
| <i>Eucalyptus melanophloia</i>             | 0 | 5 | 4.71682E-06 | 6.98601E-11 | 1.84E+08  | 3 |
| <i>Eucalyptus meliodora</i>                | 0 | 5 | 3.61477E-06 | 4.10289E-11 | 1.64E+08  | 3 |
| <i>Eucalyptus sideroxylon</i>              | 0 | 5 | 2.83134E-06 | 2.51718E-11 | 2.84E+08  | 3 |
| <i>Eucalyptus staigeriana</i>              | 0 | 5 | 5.81651E-06 | 1.06232E-10 | 2.92E+08  | 3 |
| <i>Eucalyptus tessellaris</i>              | 0 | 5 | 6.2891E-06  | 1.24196E-10 | 2.91E+08  | 3 |
| <i>Eucalyptus camaldulensis</i>            | 0 | 5 | 5.65957E-06 | 1.00576E-10 | 1.19E+08  | 3 |
| <i>Eucalyptus citriodora</i>               | 0 | 5 | 3.77252E-06 | 4.46883E-11 | 2.48E+08  | 3 |
| <i>Eucalyptus camaldulensis</i>            | 0 | 5 | 5.81651E-06 | 1.06232E-10 | 1.21E+08  | 3 |
| <i>Eucalyptus citriodora</i>               | 0 | 5 | 3.77252E-06 | 4.46883E-11 | 2.88E+08  | 3 |
| <i>Melaleuca styphelioides</i>             | 0 | 5 | 3.61477E-06 | 4.10289E-11 | 3.67E+08  | 3 |
| <i>Myrcia magnoliifolia DC.</i>            | 0 | 5 | 3.33333E-06 | 3.48889E-11 | 406000000 | 4 |
| <i>Neea altissima Poepp. &amp; Endl.</i>   | 0 | 5 | 4.08333E-06 | 5.23551E-11 | 110200000 | 4 |
| <i>Neea oppositifolia Ruiz. &amp; Pav.</i> | 0 | 5 | 1.76667E-06 | 9.80029E-12 | 539700000 | 4 |
| <i>Ouratea discophora Ducke</i>            | 0 | 5 | 0.00000375  | 4.41563E-11 | 150000000 | 4 |
| <i>Fraxinus americana</i>                  | 0 | 5 | 3.61477E-06 | 4.10289E-11 | 1.50E+08  | 3 |
| <i>Fraxinus nigra</i>                      | 0 | 5 | 3.14455E-06 | 3.10489E-11 | 2.90E+08  | 3 |
| <i>Fraxinus americana</i>                  | 0 | 5 | 3.46003E-06 | 3.75914E-11 | 1.29E+08  | 3 |
| <i>Fraxinus excelsior</i>                  | 0 | 5 | 4.00E-06    | 5.03E-11    | 2.28E+08  | 2 |
| <i>Jasminum fruticans</i>                  | 0 | 5 | 4.58E-06    | 6.59E-11    | 2.51E+08  | 2 |
| <i>Ligustrum vulgare</i>                   | 0 | 5 | 4.81E-06    | 7.26E-11    | 2.00E+08  | 2 |
| <i>Minquartia guianensis Aubl.</i>         | 0 | 5 | 1.66667E-06 | 8.72222E-12 | 519300000 | 4 |
| <i>Phillyrea media</i>                     | 0 | 5 | 2.83134E-06 | 2.51718E-11 | 4.72E+08  | 3 |
| <i>Phillyrea media</i>                     | 0 | 5 | 3.30338E-06 | 3.42647E-11 | 5.13E+08  | 3 |
| <i>Papaver glaucum</i>                     | 0 | 5 | 6.29E-06    | 1.24E-10    | 1.08E+08  | 2 |
| <i>Papaver orientale</i>                   | 0 | 5 | 6.47E-06    | 1.31E-10    | 1.77E+08  | 2 |
| <i>Athyllis biossieri</i>                  | 0 | 5 | 4.42E-06    | 6.14E-11    | 1.47E+08  | 2 |
| <i>Astragalus alyssoides</i>               | 0 | 5 | 4.02E-06    | 5.07E-11    | 1.33E+08  | 2 |
| <i>Astragalus aureus</i>                   | 0 | 5 | 3.04E-06    | 2.90E-11    | 2.22E+08  | 2 |
| <i>Astragalus bicolor</i>                  | 0 | 5 | 3.79E-06    | 4.51E-11    | 1.59E+08  | 2 |
| <i>Astragalus glycyphyllus</i>             | 0 | 5 | 5.26E-06    | 8.68E-11    | 1.10E+08  | 2 |
| <i>Astragalus hamosus</i>                  | 0 | 5 | 4.01E-06    | 5.04E-11    | 1.99E+08  | 2 |

|                                  |   |   |          |          |          |   |
|----------------------------------|---|---|----------|----------|----------|---|
| <i>Astragalus hirticalyx</i>     | 0 | 5 | 3.26E-06 | 3.33E-11 | 3.84E+08 | 2 |
| <i>Astragalus macrourus</i>      | 0 | 5 | 3.37E-06 | 3.57E-11 | 1.80E+08 | 2 |
| <i>Astragalus microcephalus</i>  | 0 | 5 | 3.44E-06 | 3.72E-11 | 2.01E+08 | 2 |
| <i>Astragalus onobrychioides</i> | 0 | 5 | 3.98E-06 | 4.98E-11 | 1.20E+08 | 2 |
| <i>Astragalus pinetorum</i>      | 0 | 5 | 3.93E-06 | 4.84E-11 | 1.74E+08 | 2 |
| <i>Astragalus schistosus</i>     | 0 | 5 | 4.56E-06 | 6.52E-11 | 1.60E+08 | 2 |
| <i>Astragalus tribulodites</i>   | 0 | 5 | 3.46E-06 | 3.76E-11 | 3.94E+08 | 2 |
| <i>Colutea cilicica</i>          | 0 | 5 | 3.99E-06 | 5.00E-11 | 1.74E+08 | 2 |
| <i>Coronilla scorpioides</i>     | 0 | 5 | 3.93E-06 | 4.85E-11 | 1.85E+08 | 2 |
| <i>Coronilla varia</i>           | 0 | 5 | 4.11E-06 | 5.29E-11 | 1.99E+08 | 2 |
| <i>Dorycnium intermedium</i>     | 0 | 5 | 3.79E-06 | 4.52E-11 | 1.44E+08 | 2 |
| <i>Hipporepis unisiliquosa</i>   | 0 | 5 | 3.49E-06 | 3.82E-11 | 2.01E+08 | 2 |
| <i>Lathyrus cyaneus</i>          | 0 | 5 | 5.44E-06 | 9.28E-11 | 9.54E+07 | 2 |
| <i>Lathyrus laxiflorus</i>       | 0 | 5 | 5.48E-06 | 9.44E-11 | 7.44E+07 | 2 |
| <i>Lathyrus prateusis</i>        | 0 | 5 | 4.91E-06 | 7.58E-11 | 6.98E+07 | 2 |
| <i>Lathyrus rotundifolius</i>    | 0 | 5 | 5.18E-06 | 8.41E-11 | 6.50E+07 | 2 |
| <i>Lotus corniculatus</i>        | 0 | 5 | 4.38E-06 | 6.02E-11 | 1.38E+08 | 2 |
| <i>Medicago minima</i>           | 0 | 5 | 3.15E-06 | 3.11E-11 | 2.80E+08 | 2 |
| <i>Medicago rigidula</i>         | 0 | 5 | 3.25E-06 | 3.32E-11 | 2.68E+08 | 2 |
| <i>Medicago sativa</i>           | 0 | 5 | 2.87E-06 | 2.58E-11 | 2.90E+08 | 2 |
| <i>Onobrychis bungei</i>         | 0 | 5 | 3.36E-06 | 3.55E-11 | 2.07E+08 | 2 |
| <i>Onobrychis cornuta</i>        | 0 | 5 | 3.40E-06 | 3.63E-11 | 1.93E+08 | 2 |
| <i>Onobrychis hohenackeriana</i> | 0 | 5 | 3.82E-06 | 4.58E-11 | 1.93E+08 | 2 |
| <i>Onobrychis michauxii</i>      | 0 | 5 | 3.87E-06 | 4.71E-11 | 2.93E+08 | 2 |
| <i>Securigera securidaca</i>     | 0 | 5 | 3.89E-06 | 4.76E-11 | 1.41E+08 | 2 |
| <i>Trifolium arveuse</i>         | 0 | 5 | 3.56E-06 | 3.98E-11 | 2.11E+08 | 2 |
| <i>Trifolium campestre</i>       | 0 | 5 | 3.37E-06 | 3.57E-11 | 1.46E+08 | 2 |
| <i>Trifolium canesceus</i>       | 0 | 5 | 3.40E-06 | 3.63E-11 | 2.15E+08 | 2 |
| <i>Trifolium hybridum</i>        | 0 | 5 | 2.71E-06 | 2.31E-11 | 3.73E+08 | 2 |
| <i>Trifolium montanum</i>        | 0 | 5 | 4.18E-06 | 5.49E-11 | 2.35E+08 | 2 |
| <i>Trifolium prateuse</i>        | 0 | 5 | 3.38E-06 | 3.58E-11 | 2.17E+08 | 2 |
| <i>Trifolium repeus</i>          | 0 | 5 | 2.91E-06 | 2.67E-11 | 2.06E+08 | 2 |
| <i>Trifolium scabrum</i>         | 0 | 5 | 3.20E-06 | 3.22E-11 | 2.53E+08 | 2 |
| <i>Trigonella brachycarpa</i>    | 0 | 5 | 3.37E-06 | 3.57E-11 | 2.83E+08 | 2 |
| <i>Trigonella callicerias</i>    | 0 | 5 | 3.83E-06 | 4.60E-11 | 1.65E+08 | 2 |
| <i>Trigonella gladiata</i>       | 0 | 5 | 4.02E-06 | 5.07E-11 | 2.06E+08 | 2 |
| <i>Trigonella mouspeliaca</i>    | 0 | 5 | 4.19E-06 | 5.51E-11 | 1.88E+08 | 2 |
| <i>Trigonella spicata</i>        | 0 | 5 | 3.70E-06 | 4.30E-11 | 2.44E+08 | 2 |
| <i>Vicia grandiflora</i>         | 0 | 5 | 3.97E-06 | 4.95E-11 | 1.78E+08 | 2 |
| <i>Vicia hybrida</i>             | 0 | 5 | 4.82E-06 | 7.29E-11 | 8.30E+07 | 2 |
| <i>Vicia truncatula</i>          | 0 | 5 | 5.07E-06 | 8.08E-11 | 6.27E+07 | 2 |

|                                      |   |   |             |             |          |   |
|--------------------------------------|---|---|-------------|-------------|----------|---|
| <i>Vicia variegata</i>               | 0 | 5 | 4.56E-06    | 6.53E-11    | 8.16E+07 | 2 |
| <i>Plantago lanceolata</i>           | 0 | 5 | 4.09E-06    | 5.25E-11    | 2.67E+08 | 2 |
| <i>Plantago ovata</i>                | 0 | 5 | 4.55E-06    | 6.50E-11    | 1.39E+08 | 2 |
| <i>Plantago psillium</i>             | 0 | 5 | 4.97E-06    | 7.76E-11    | 1.52E+08 | 2 |
| <i>Platanus occidentalis</i>         | 0 | 5 | 4.08705E-06 | 5.24505E-11 | 3.06E+08 | 3 |
| <i>Atraphaxis spinosa</i>            | 0 | 5 | 4.95E-06    | 7.68E-11    | 1.51E+08 | 2 |
| <i>Polygonum alpestre</i>            | 0 | 5 | 5.53E-06    | 9.62E-11    | 1.16E+08 | 2 |
| <i>Rumex acetoselloides</i>          | 0 | 5 | 6.66E-06    | 1.39E-10    | 8.55E+07 | 2 |
| <i>Rumex tuberosus</i>               | 0 | 5 | 6.31E-06    | 1.25E-10    | 8.91E+07 | 2 |
| <i>Anagallis arvensis</i>            | 0 | 5 | 6.42E-06    | 1.29E-10    | 8.37E+07 | 2 |
| <i>Androsace villosa</i>             | 0 | 5 | 6.20E-06    | 1.21E-10    | 6.06E+07 | 2 |
| <i>Primula anriculata</i>            | 0 | 5 | 4.83E-06    | 7.32E-11    | 1.17E+08 | 2 |
| <i>Primula macrocalyx</i>            | 0 | 5 | 4.67E-06    | 6.83E-11    | 1.16E+08 | 2 |
| <i>Adonis aestivalis</i>             | 0 | 5 | 1.03E-05    | 3.31E-10    | 2.74E+07 | 2 |
| <i>Anemone albana</i>                | 0 | 5 | 6.43E-06    | 1.30E-10    | 1.62E+08 | 2 |
| <i>Delphinium tuberosum</i>          | 0 | 5 | 8.37E-06    | 2.20E-10    | 8.25E+07 | 2 |
| <i>Ranunculus caucasicus</i>         | 0 | 5 | 6.04E-06    | 1.14E-10    | 9.86E+07 | 2 |
| <i>Ranunculus polyanthemus</i>       | 0 | 5 | 8.42E-06    | 2.22E-10    | 7.70E+07 | 2 |
| <i>Ranunculus strigillosus</i>       | 0 | 5 | 6.70E-06    | 1.41E-10    | 6.90E+07 | 2 |
| <i>Thalictrum minus</i>              | 0 | 5 | 3.93E-06    | 4.86E-11    | 2.49E+08 | 2 |
| <i>Paliurus spine Christi</i>        | 0 | 5 | 3.60E-06    | 4.08E-11    | 4.38E+08 | 2 |
| <i>Rhamnus catharica</i>             | 0 | 5 | 4.37E-06    | 5.98E-11    | 2.57E+08 | 2 |
| <i>Rhamnus pallasii</i>              | 0 | 5 | 4.63E-06    | 6.74E-11    | 2.59E+08 | 2 |
| <i>Agrimonia eupatoria</i>           | 0 | 5 | 4.49E-06    | 6.34E-11    | 2.31E+08 | 2 |
| <i>Alchemilla fluminea</i>           | 0 | 5 | 4.77E-06    | 7.14E-11    | 2.71E+08 | 2 |
| <i>Alchemilla erythropoda</i>        | 0 | 5 | 4.15E-06    | 5.40E-11    | 2.49E+08 | 2 |
| <i>Alchemilla persica</i>            | 0 | 5 | 3.78E-06    | 4.48E-11    | 2.55E+08 | 2 |
| <i>Alchemilla pseudo-cartalinica</i> | 0 | 5 | 4.31E-06    | 5.83E-11    | 2.28E+08 | 2 |
| <i>Alchemilla sericata</i>           | 0 | 5 | 4.67E-06    | 6.86E-11    | 2.31E+08 | 2 |
| <i>Amygdalus fenzliana</i>           | 0 | 5 | 6.22E-06    | 1.21E-10    | 2.08E+08 | 2 |
| <i>Cerasus avium</i>                 | 0 | 5 | 4.52E-06    | 6.43E-11    | 2.60E+08 | 2 |
| <i>Cerasus incana</i>                | 0 | 5 | 4.75E-06    | 7.07E-11    | 2.00E+08 | 2 |
| <i>Cotoneaster nummularioides</i>    | 0 | 5 | 4.55E-06    | 6.49E-11    | 2.17E+08 | 2 |
| <i>Cotoneaster nummularia</i>        | 0 | 5 | 5.81E-06    | 1.06E-10    | 1.78E+08 | 2 |
| <i>Crataegus meyeri</i>              | 0 | 5 | 6.53E-06    | 1.34E-10    | 1.27E+08 | 2 |
| <i>Filipendula vulgaris</i>          | 0 | 5 | 3.98E-06    | 4.97E-11    | 3.98E+08 | 2 |
| <i>Fragaria vesca</i>                | 0 | 5 | 3.59E-06    | 4.05E-11    | 3.18E+08 | 2 |
| <i>Geum rivale</i>                   | 0 | 5 | 4.07E-06    | 5.20E-11    | 3.51E+08 | 2 |
| <i>Geum urbanum</i>                  | 0 | 5 | 4.39E-06    | 6.06E-11    | 1.27E+08 | 2 |
| <i>Mespilus germanica</i>            | 0 | 5 | 4.32E-06    | 5.85E-11    | 2.27E+08 | 2 |
| <i>Potentilla ancheriana</i>         | 0 | 5 | 4.89E-06    | 7.51E-11    | 2.99E+08 | 2 |



|                                                    |   |   |             |             |           |   |
|----------------------------------------------------|---|---|-------------|-------------|-----------|---|
| <i>Potentilla inclinata</i>                        | 0 | 5 | 4.29E-06    | 5.77E-11    | 2.93E+08  | 2 |
| <i>Potentilla recta</i>                            | 0 | 5 | 4.39E-06    | 6.05E-11    | 2.58E+08  | 2 |
| <i>Potentilla szovitsii</i>                        | 0 | 5 | 4.19E-06    | 5.51E-11    | 3.95E+08  | 2 |
| <i>Prunus pennsylvanica</i>                        | 0 | 5 | 4.32222E-06 | 5.86603E-11 | 2.60E+08  | 3 |
| <i>Prunus serotina</i>                             | 0 | 5 | 3.61477E-06 | 4.10289E-11 | 1.50E+08  | 3 |
| <i>Prunus serotina (seedling)</i>                  | 0 | 5 | 3.46003E-06 | 3.75914E-11 | 2.37E+08  | 3 |
| <i>Prunus serotina (mature)</i>                    | 0 | 5 | 3.30338E-06 | 3.42647E-11 | 1.83E+08  | 3 |
| <i>Prunus amygdalus</i>                            | 0 | 5 | 4.71682E-06 | 6.98601E-11 | 3.27E+08  | 3 |
| <i>Prunus amygdalus</i>                            | 0 | 5 | 4.56076E-06 | 6.53136E-11 | 3.60E+08  | 3 |
| <i>Prunus divaricata</i>                           | 0 | 5 | 3.97E-06    | 4.94E-11    | 4.08E+08  | 2 |
| <i>Prunus spinosa</i>                              | 0 | 5 | 4.64E-06    | 6.77E-11    | 2.73E+08  | 2 |
| <i>Pyrus malus</i>                                 | 0 | 5 | 3.77252E-06 | 4.46883E-11 | 4.44E+08  | 3 |
| <i>Pyrus malus</i>                                 | 0 | 5 | 3.46003E-06 | 3.75914E-11 | 5.34E+08  | 3 |
| <i>Pyrus syriaca</i>                               | 0 | 5 | 4.97E-06    | 7.77E-11    | 1.33E+08  | 2 |
| <i>Rosa canina</i>                                 | 0 | 5 | 4.70E-06    | 6.93E-11    | 1.51E+08  | 2 |
| <i>Rosa iberica</i>                                | 0 | 5 | 4.64E-06    | 6.77E-11    | 1.33E+08  | 2 |
| <i>Rosa pimpinellifolia</i>                        | 0 | 5 | 5.33E-06    | 8.91E-11    | 7.83E+07  | 2 |
| <i>Sanguisorba minor</i>                           | 0 | 5 | 3.94E-06    | 4.87E-11    | 4.01E+08  | 2 |
| <i>Sorbus torminalis</i>                           | 0 | 5 | 4.51E-06    | 6.40E-11    | 1.71E+08  | 2 |
| <i>Spiraea crenata</i>                             | 0 | 5 | 3.83E-06    | 4.62E-11    | 2.35E+08  | 2 |
| <i>Spiraea hypericifolia</i>                       | 0 | 5 | 3.49E-06    | 3.83E-11    | 2.96E+08  | 2 |
| <i>Asperula glomerata</i>                          | 0 | 5 | 6.61E-06    | 1.37E-10    | 8.01E+07  | 2 |
| <i>Asperula molluginoides</i>                      | 0 | 5 | 5.80E-06    | 1.05E-10    | 7.06E+07  | 2 |
| <i>Callipeltis cucullaris</i>                      | 0 | 5 | 5.83E-06    | 1.07E-10    | 1.23E+08  | 2 |
| <i>Cruciata laevipes</i>                           | 0 | 5 | 4.98E-06    | 7.80E-11    | 9.05E+07  | 2 |
| <i>Cruciata tanrica</i>                            | 0 | 5 | 4.87E-06    | 7.45E-11    | 1.36E+08  | 2 |
| <i>Galium aparine</i>                              | 0 | 5 | 6.54E-06    | 1.34E-10    | 5.70E+07  | 2 |
| <i>Galium odoratum</i>                             | 0 | 5 | 5.37E-06    | 9.07E-11    | 6.12E+07  | 2 |
| <i>Galium verum</i>                                | 0 | 5 | 5.03E-06    | 7.94E-11    | 2.34E+08  | 2 |
| <i>Sherardia arveusis</i>                          | 0 | 5 | 5.11E-06    | 8.21E-11    | 1.69E+08  | 2 |
| <i>Ferdinandusa elliptica (Pohl. ) Pohl.</i>       | 0 | 5 | 3.75833E-06 | 4.43527E-11 | 204500000 | 4 |
| <i>Duroia kotchubaeoides Steyerm</i>               | 0 | 5 | 3.33333E-06 | 3.48889E-11 | 213800000 | 4 |
| <i>Citrus paradisi</i>                             | 0 | 5 | 2.19958E-06 | 1.51918E-11 | 7.13E+08  | 3 |
| <i>Citrus sinensis</i>                             | 0 | 5 | 3.46003E-06 | 3.75914E-11 | 5.80E+08  | 3 |
| <i>Citrus paradisi paradisi</i>                    | 0 | 5 | 2.19958E-06 | 1.51918E-11 | 7.80E+08  | 3 |
| <i>Citrus sinensis sinensis</i>                    | 0 | 5 | 2.83134E-06 | 2.51718E-11 | 6.82E+08  | 3 |
| <i>Populus alba - 4877</i>                         | 0 | 5 | 3.06493E-06 | 2.94965E-11 | 2.64E+08  | 3 |
| <i>Populus candicans X P. berolinensis - 5262</i>  | 0 | 5 | 4.90403E-06 | 7.55154E-11 | 1.27E+08  | 3 |
| <i>Populus candicans X P. berolinensis - 5263</i>  | 0 | 5 | 4.8095E-06  | 7.26323E-11 | 1.23E+08  | 3 |
| <i>Populus betulifolia X P. trichocarpa - 5331</i> | 0 | 5 | 3.71118E-06 | 4.32467E-11 | 1.09E+08  | 3 |

|                                                            |   |   |             |             |           |   |
|------------------------------------------------------------|---|---|-------------|-------------|-----------|---|
| <i>Populus betulifolia</i> X <i>P. trichocarpa</i> - 5332  | 0 | 5 | 4.02611E-06 | 5.08981E-11 | 1.18E+08  | 3 |
| <i>Populus deltooides</i> X <i>P. Trichocarpa</i> - 5265   | 0 | 5 | 4.71682E-06 | 6.98601E-11 | 1.79E+08  | 3 |
| <i>Populus deltooides</i> X <i>P. Trichocarpa</i> - 5266   | 0 | 5 | 3.6488E-06  | 4.18052E-11 | 1.66E+08  | 3 |
| <i>Populus deltooides</i> X <i>P. Trichocarpa</i> - 5334   | 0 | 5 | 3.69688E-06 | 4.2914E-11  | 1.41E+08  | 3 |
| <i>Populus deltooides</i> X <i>P. platierensis</i> -5264   | 0 | 5 | 3.38261E-06 | 3.5928E-11  | 1.26E+08  | 3 |
| <i>Populus deltooides</i> X <i>P. caudina</i> -5267        | 0 | 5 | 4.29353E-06 | 5.78841E-11 | 8.90E+07  | 3 |
| <i>Populus charkowiensis</i> X <i>P. deltooides</i> - 5271 | 0 | 5 | 5.1086E-06  | 8.1947E-11  | 1.67E+08  | 3 |
| <i>Populus tristis</i> X <i>P. balsamifera</i> -5260       | 0 | 5 | 4.74668E-06 | 7.07472E-11 | 1.41E+08  | 3 |
| <i>Populus</i> sp. -5258                                   | 0 | 5 | 4.84243E-06 | 7.36303E-11 | 1.16E+08  | 3 |
| <i>Populus nigra</i> X <i>P. laurifolia</i> -5272          | 0 | 5 | 3.75846E-06 | 4.43556E-11 | 1.41E+08  | 3 |
| <i>Populus gileadensis</i>                                 | 0 | 5 | 7.07648E-06 | 1.57241E-10 | 1.19E+08  | 3 |
| <i>Populus x euramericana</i> -4878                        | 0 | 5 | 3.80515E-06 | 4.54645E-11 | 1.60E+08  | 3 |
| <i>Populus x euramericana</i> -4879                        | 0 | 5 | 3.66329E-06 | 4.21378E-11 | 1.50E+08  | 3 |
| <i>Populus x euramericana</i> -5322                        | 0 | 5 | 4.16833E-06 | 5.45574E-11 | 1.25E+08  | 3 |
| <i>Populus x euramericana</i> -5323                        | 0 | 5 | 3.88323E-06 | 4.73496E-11 | 1.30E+08  | 3 |
| <i>Populus x euramericana</i> -5326                        | 0 | 5 | 4.70183E-06 | 6.94165E-11 | 1.76E+08  | 3 |
| <i>Populus x euramericana</i> -5328                        | 0 | 5 | 4.922E-06   | 7.60699E-11 | 1.68E+08  | 3 |
| <i>Populus x euramericana</i> -5377                        | 0 | 5 | 4.6679E-06  | 6.84185E-11 | 1.05E+08  | 3 |
| <i>Salix nigra</i>                                         | 0 | 5 | 2.83134E-06 | 2.51718E-11 | 4.31E+08  | 3 |
| <i>Aesculus hippocastanum</i>                              | 0 | 5 | 3.72068E-06 | 4.34685E-11 | 2.10E+08  | 3 |
| <i>Aesculus glabra</i>                                     | 0 | 5 | 2.98909E-06 | 2.80549E-11 | 3.45E+08  | 3 |
| <i>Matayba arborescens</i> (Aubl.) Raldlk                  | 0 | 5 | 0.0000025   | 1.9625E-11  | 540500000 | 4 |
| <i>Ecclinusa guianensis</i> Eyma                           | 0 | 5 | 2.28333E-06 | 1.63707E-11 | 316500000 | 4 |
| <i>Pouteria guianensis</i> Aubl.                           | 0 | 5 | 3.34167E-06 | 3.50636E-11 | 285600000 | 4 |
| <i>Pouteria jariensis</i> Pires T.D. Penn                  | 0 | 5 | 0.0000025   | 1.9625E-11  | 284500000 | 4 |
| <i>Pouteria reticulata</i> (Engl.) Eyma                    | 0 | 5 | 3.33333E-06 | 3.48889E-11 | 277800000 | 4 |
| <i>Pouteria retinervis</i> T. D. Penn                      | 0 | 5 | 2.91667E-06 | 2.67118E-11 | 212000000 | 4 |
| <i>Digitalis nervosa</i>                                   | 0 | 5 | 5.85E-06    | 1.07E-10    | 1.11E+08  | 2 |
| <i>Linaria kurdica</i> *                                   | 0 | 5 | 5.34E-06    | 8.94E-11    | 1.16E+08  | 2 |
| <i>Myoporum serratum serratum</i>                          | 0 | 5 | 4.71682E-06 | 6.98601E-11 | 2.00E+08  | 3 |
| <i>Pedicularis sibthorpii</i>                              | 0 | 5 | 4.70E-06    | 6.94E-11    | 3.02E+08  | 2 |
| <i>Pedicularis wilhelmsiana</i>                            | 0 | 5 | 4.12E-06    | 5.33E-11    | 3.54E+08  | 2 |
| <i>Scrophularia oxysepala</i>                              | 0 | 5 | 4.52E-06    | 6.42E-11    | 3.33E+08  | 2 |
| <i>Scrophularia umbrosa</i>                                | 0 | 5 | 3.66E-06    | 4.21E-11    | 2.79E+08  | 2 |
| <i>Scrophularia varegata</i>                               | 0 | 5 | 4.96E-06    | 7.72E-11    | 1.41E+08  | 2 |
| <i>Verbascum orientale</i>                                 | 0 | 5 | 4.53E-06    | 6.44E-11    | 1.51E+08  | 2 |
| <i>Verbascum suworowianum</i>                              | 0 | 5 | 4.63E-06    | 6.74E-11    | 1.83E+08  | 2 |
| <i>Verbascum speciosum</i>                                 | 0 | 5 | 4.44E-06    | 6.19E-11    | 2.55E+08  | 2 |
| <i>Veronica anagallis-aquatica</i>                         | 0 | 5 | 5.34E-06    | 8.96E-11    | 1.10E+08  | 2 |

|                                          |   |   |             |             |           |   |
|------------------------------------------|---|---|-------------|-------------|-----------|---|
| <i>Veronica gentianoides</i>             | 0 | 5 | 6.10E-06    | 1.17E-10    | 1.17E+08  | 2 |
| <i>Veronica multifida</i>                | 0 | 5 | 5.54E-06    | 9.62E-11    | 1.58E+08  | 2 |
| <i>Veronica polita</i>                   | 0 | 5 | 4.10E-06    | 5.29E-11    | 1.35E+08  | 2 |
| <i>Nicotiana tabacum</i>                 | 0 | 5 | 5.23155E-06 | 8.5939E-11  | 1.90E+08  | 3 |
| <i>Ulmus rubra</i>                       | 0 | 5 | 3.77252E-06 | 4.46883E-11 | 1.50E+08  | 3 |
| <i>Ulmus americana</i>                   | 0 | 5 | 2.83134E-06 | 2.51718E-11 | 2.30E+08  | 3 |
| <i>Celtis caucasica</i>                  | 0 | 5 | 3.46E-06    | 3.76E-11    | 7.42E+08  | 2 |
| <i>Ulmus glabra</i>                      | 0 | 5 | 5.64E-06    | 9.99E-11    | 2.80E+08  | 2 |
| <i>Ulmus minor</i>                       | 0 | 5 | 5.59E-06    | 9.80E-11    | 4.34E+08  | 2 |
| <i>Albovia tripartita</i>                | 0 | 5 | 4.24E-06    | 5.65E-11    | 1.45E+08  | 2 |
| <i>Bupleurum falcatum</i>                | 0 | 5 | 3.22E-06    | 3.25E-11    | 1.27E+08  | 2 |
| <i>Bupleurum gerardii</i>                | 0 | 5 | 2.96E-06    | 2.75E-11    | 1.66E+08  | 2 |
| <i>Carum carvi</i>                       | 0 | 5 | 4.58E-06    | 6.60E-11    | 2.89E+08  | 2 |
| <i>Caucalis platycarpus</i>              | 0 | 5 | 4.41E-06    | 6.11E-11    | 2.26E+08  | 2 |
| <i>Chaerophyllum anreum</i>              | 0 | 5 | 3.58E-06    | 4.02E-11    | 3.27E+08  | 2 |
| <i>Cymbocarpum anethoides</i>            | 0 | 5 | 5.44E-06    | 9.28E-11    | 1.08E+08  | 2 |
| <i>Daucus broteri</i>                    | 0 | 5 | 3.39E-06    | 3.61E-11    | 3.00E+08  | 2 |
| <i>Eryngium caucasicum</i>               | 0 | 5 | 4.38E-06    | 6.03E-11    | 1.08E+08  | 2 |
| <i>Falcaria vulgaris</i>                 | 0 | 5 | 3.90E-06    | 4.78E-11    | 1.08E+08  | 2 |
| <i>Heracleum pastinacifolium</i>         | 0 | 5 | 4.52E-06    | 6.42E-11    | 2.98E+08  | 2 |
| <i>Heracleum persicum</i>                | 0 | 5 | 3.91E-06    | 4.80E-11    | 2.76E+08  | 2 |
| <i>Laser trilobum</i>                    | 0 | 5 | 4.96E-06    | 7.73E-11    | 1.09E+08  | 2 |
| <i>Peucedanum canasicum</i>              | 0 | 5 | 3.81E-06    | 4.56E-11    | 1.73E+08  | 2 |
| <i>Pimpinella anrea</i>                  | 0 | 5 | 3.47E-06    | 3.77E-11    | 5.33E+08  | 2 |
| <i>Pimpinella tragium</i>                | 0 | 5 | 4.46E-06    | 6.23E-11    | 1.58E+08  | 2 |
| <i>Prangosferulacea</i>                  | 0 | 5 | 7.59E-06    | 1.81E-10    | 5.00E+07  | 2 |
| <i>Sanicula europaea</i>                 | 0 | 5 | 3.85E-06    | 4.64E-11    | 9.04E+07  | 2 |
| <i>Seselipeucedanoides</i>               | 0 | 5 | 4.81E-06    | 7.26E-11    | 2.23E+08  | 2 |
| <i>Trinia leiogona</i>                   | 0 | 5 | 4.47E-06    | 6.26E-11    | 9.39E+07  | 2 |
| <i>Valerianella dactylophylla</i>        | 0 | 5 | 5.70E-06    | 1.02E-10    | 8.33E+07  | 2 |
| <i>Valerianella lasiocarpa</i>           | 0 | 5 | 4.49E-06    | 6.34E-11    | 1.03E+08  | 2 |
| <i>Violaceae</i>                         |   |   |             |             |           |   |
| <i>Viola arvensis</i>                    | 0 | 5 | 5.89E-06    | 1.09E-10    | 9.49E+07  | 2 |
| <i>Viola odorata</i>                     | 0 | 5 | 4.53E-06    | 6.45E-11    | 1.35E+08  | 2 |
| <i>Rinorea paniculata (Mart.) Kuntze</i> | 0 | 5 | 3.75E-06    | 4.41563E-11 | 175400000 | 4 |
| <i>Qualea acuminata Spruce ex. Warm</i>  | 0 | 5 | 2.91667E-06 | 2.67118E-11 | 864600000 | 4 |
| <i>Balanites aegyptiaca</i>              | 0 | 5 | 3.93293E-06 | 4.85694E-11 | 4.60E+07  | 3 |
| <i>Panicum bisulcatum</i>                | 0 | 5 | 2.54911E-06 | 2.04036E-11 | 1.97E+08  | 3 |
| <i>Panicum antidotale</i>                | 0 | 5 | 1.91644E-06 | 1.15325E-11 | 1.26E+08  | 3 |
| <i>Panicum coloratum</i>                 | 0 | 5 | 2.54911E-06 | 2.04036E-11 | 1.13E+08  | 3 |
| <i>Panicum dichotomiflorum</i>           | 0 | 5 | 2.4285E-06  | 1.85185E-11 | 9.00E+07  | 3 |

|                                                 |   |   |             |             |           |   |
|-------------------------------------------------|---|---|-------------|-------------|-----------|---|
| <i>Zea mays</i>                                 | 0 | 5 | 6.03697E-06 | 1.14437E-10 | 1.08E+08  | 3 |
| <i>Zea mays</i>                                 | 0 | 5 | 3.21123E-06 | 3.23796E-11 | 1.12E+08  | 3 |
| <i>Zoisia japonica</i>                          | 0 | 5 | 1.81226E-06 | 1.03127E-11 | 8.20E+07  | 3 |
| <i>Zoisia tenuifolia</i>                        | 0 | 5 | 1.39367E-06 | 6.0989E-12  | 2.52E+08  | 3 |
| <i>Digitaria sanguinalis</i>                    | 0 | 5 | 2.63092E-06 | 2.17342E-11 | 1.19E+08  | 3 |
| <i>Zizania latifolia</i>                        | 0 | 5 | 1.14309E-06 | 4.10289E-12 | 6.06E+08  | 3 |
| <i>Echinochloa crus-galli</i>                   | 0 | 5 | 2.20759E-06 | 1.53027E-11 | 1.70E+08  | 3 |
| <i>Echinochloa crus-galli var. edulis</i>       | 0 | 5 | 2.51424E-06 | 1.98491E-11 | 9.30E+07  | 3 |
| <i>Echinochloa crus-galli var. frumentaceae</i> | 0 | 5 | 2.04136E-06 | 1.30849E-11 | 1.40E+08  | 3 |
| <i>Echinochloa crus-galli var. hispidula</i>    | 0 | 5 | 2.07567E-06 | 1.35285E-11 | 1.95E+08  | 3 |
| <i>Avena sativa</i>                             | 0 | 5 | 7.17068E-06 | 1.61454E-10 | 4.50E+07  | 3 |
| <i>Avena sativa</i>                             | 0 | 5 | 3.63911E-06 | 4.15834E-11 | 5.40E+07  | 3 |
| <i>Hordeum vulgare</i>                          | 0 | 5 | 5.30861E-06 | 8.84894E-11 | 8.50E+07  | 3 |
| <i>Hordeum vulgare var. hexastichon</i>         | 0 | 5 | 4.15135E-06 | 5.41138E-11 | 2.30E+07  | 3 |
| <i>Paspalum dlitatum</i>                        | 0 | 5 | 2.30923E-06 | 1.67442E-11 | 8.70E+07  | 3 |
| <i>Paspalum distichum</i>                       | 0 | 5 | 2.23936E-06 | 1.57462E-11 | 1.18E+08  | 3 |
| <i>Saccharum officinarum cv. Badira</i>         | 0 | 5 | 2.48598E-06 | 1.94056E-11 | 2.92E+08  | 3 |
| <i>Saccharum officinarum cv. Yomitanzan</i>     | 0 | 5 | 2.83757E-06 | 2.52827E-11 | 1.82E+08  | 3 |
| <i>Saccharum officinarum cv. Tainan</i>         | 0 | 5 | 2.45741E-06 | 1.8962E-11  | 1.69E+08  | 3 |
| <i>Saccharum spp. cv. NCo310</i>                | 0 | 5 | 3.08216E-06 | 2.98291E-11 | 1.77E+08  | 3 |
| <i>Agropyron tsukusiense</i>                    | 0 | 5 | 3.53575E-06 | 3.92547E-11 | 2.40E+07  | 3 |
| <i>Eragrostis ferruginae</i>                    | 0 | 5 | 1.99765E-06 | 1.25305E-11 | 8.60E+07  | 3 |
| <i>Andropogon scoparis</i>                      | 0 | 5 | 2.96395E-06 | 6.145E-11   | 124000000 | 3 |
| <i>Arundinalla hirta</i>                        | 0 | 5 | 3.00089E-06 | 2.82767E-11 | 7.30E+07  | 3 |
| <i>Arundo donax</i>                             | 0 | 5 | 2.32448E-06 | 1.6966E-11  | 3.01E+08  | 3 |
| <i>Triticum vulgare</i>                         | 0 | 5 | 7.2393E-06  | 1.64559E-10 | 4.00E+07  | 3 |
| <i>Sorghum bicolor</i>                          | 0 | 5 | 2.69064E-06 | 2.27322E-11 | 1.27E+08  | 3 |
| <i>Sorghum sudanense</i>                        | 0 | 5 | 2.14265E-06 | 1.44156E-11 | 1.17E+08  | 3 |
| <i>Vetivera sp.</i>                             | 0 | 5 | 2.30157E-06 | 1.66334E-11 | 1.36E+08  | 3 |
| <i>Miscanthus sinensis</i>                      | 0 | 5 | 2.14265E-06 | 1.44156E-11 | 2.92E+08  | 3 |
| <i>Stenotaphrum seundatum</i>                   | 0 | 5 | 2.4285E-06  | 1.85185E-11 | 4.70E+07  | 3 |
| <i>Sporobolus elongatus</i>                     | 0 | 5 | 2.27844E-06 | 1.63007E-11 | 1.04E+08  | 3 |
| <i>Phalaris arundinaceae</i>                    | 0 | 5 | 1.83164E-06 | 1.05345E-11 | 1.69E+08  | 3 |
| <i>Elymus repens</i>                            | 0 | 5 | 2.50805E-06 | 4.4E-11     | 88000000  | 2 |
| <i>Eleusine coracana</i>                        | 0 | 5 | 2.34715E-06 | 1.72987E-11 | 7.60E+07  | 3 |
| <i>Cynodon dactylon</i>                         | 0 | 5 | 1.49159E-06 | 6.98601E-12 | 2.20E+08  | 3 |
| <i>Hymenachne indica</i>                        | 0 | 5 | 4.09137E-06 | 5.25614E-11 | 8.90E+07  | 3 |
| <i>Bromus catharticus</i>                       | 0 | 5 | 3.97313E-06 | 4.95674E-11 | 3.50E+07  | 3 |
| <i>Coix lacryma-jobi var. ma-yuen</i>           | 0 | 5 | 3.47022E-06 | 3.78131E-11 | 1.02E+08  | 3 |
| <i>Imperata cylindrica</i>                      | 0 | 5 | 1.67029E-06 | 8.76023E-12 | 2.87E+08  | 3 |

|                                 |   |   |             |             |          |   |
|---------------------------------|---|---|-------------|-------------|----------|---|
| <i>Chloris gayana</i>           | 0 | 5 | 1.21788E-06 | 4.65734E-12 | 6.03E+08 | 3 |
| <i>Leptochloa chinensis</i>     | 0 | 5 | 1.47971E-06 | 6.87512E-12 | 3.09E+08 | 3 |
| <i>Pennisetum alopecuroides</i> | 0 | 5 | 2.27068E-06 | 1.61898E-11 | 9.60E+07 | 3 |
| <i>Allium cepa</i>              | 0 | 5 | 7.50751E-06 | 1.76979E-10 | 1.75E+08 | 3 |
| <i>Tradescantia virginiana</i>  | 0 | 5 | 1.01895E-05 | 3.26014E-10 | 2.30E+07 | 3 |
| <i>Commelina communis</i>       | 0 | 5 | 4.51015E-06 | 6.38721E-11 | 6.70E+07 | 3 |
| <i>Paphiopedilum venustum</i>   | 0 | 5 | 1.11984E-05 | 3.93767E-10 | 2.60E+07 | 3 |

Source:

L – stomatal properties were measured in the lab on leaves or epidermal peels cleared with NaOH

- (1) Ogaya, R., Llorens, L., Penuelas, J. 2011. Density and length of stomatal and epidermal cells in "living fossil" trees grown under elevated CO<sub>2</sub> and a polar light regime. *Acta Oecologia – International Journal of Ecology* 4:381-385
- (2) Zarinkamar F. 2007. Stomatal observations in dicotyledons. *Pakistan Journal of Biological Sciences* 10(2):199-219
- (3) Franks, P.J., Beerling, D.J. 2009. Maximum leaf conductance driven by CO<sub>2</sub> effects on stomatal size and density over geologic time. *PNAS* 106:10343-10347
- (4) Camargo, M.A.B., Marengo, R.A. 2011. Density, size and distribution of stomata in 35 rainforest tree species in Central Amazonia. *Acta Amazonica* 41:205-212
- (5) Kovach, W.L., Dilcher, D.L. 1984. Dispersed cuticles from the Eocene of North America. *Botanical Journal of Linnean Society* 88:63-104
- (6) Lumaga, MRB., Coiro, M., Truernit, E., Erdei, B., De Luca, P. 2015. Epidermal micromorphology in Dioon: did volcanism constrain Dioon evolution? *Botanical Journal of the Linnean Society* 179:236-254
- (7) Haworth, M., Fitzgerald, A., McElwain, J.C. 2011. Cycads show no stomatal-density and index response to elevated carbon dioxide and subambient oxygen. *Australian Journal of Botany* 59:629-638
- (8) Pant, D.D., Khare, P.K. 1969. Epidermal structure and stomatal ontogeny in some eusporangiate ferns. *Annals of Botany* 33:795-805
- (9) Dengler, N.G., Lin E.Y.C. 1980. Electron micro-probe analysis of the distribution of silicone in the leaves of *Salaginella emmaliana*. *Canadian Journal of Botany* 58:2459-2466
- (10) Buck, W.R., Lucansky T.W. 1976. Anatomical and morphological comparison of *Salaginella apoda* and *Salaginella ludoviciana*. *Bulletin of the Torrey Botanical Club* 103:9-16
- (11) Sun, T.X., Edwards, D., Li, C.S. 2005. The stomatal apparatus of *Lycopodium japonicum* and its bearing on the stomata of the Devonian lycophyte *Drepanophycus spinaeformis*. *Botanical Journal of Linnean Society* 149:209-216
- (12) Mehra, P.N., Soni, S.L. 1983. Stomatal patterns in Pteridophytes – an evolutionary approach. *Proceedings of the Indian National Science Academy* B49:155-203
- (13) Prieto, J.A.F., Aguiar, C., Dias, E., Casado, M.D.A.F., Homet, J. 2008. The genus *Huperzia* (Lycopodiaceae) in the Azores and Madeira. *Botanical Journal of the Linnean Society* 158:522-533
- (14) Carpenter, K.J. 2005. Stomatal architecture and evolution in basal angiosperms. *American Journal of Botany* 92:1595-1615
- (15) Kong, H.Z. 2001. Comparative morphology of leaf epidermis in the Chloranthaceae. *Botanical Journal of Linnean Society* 136:279-294
